1 **Bacteria contribute to plant secondary compound degradation in a generalist herbivore**  
2 **system**

3 Charlotte B. Francoeur<sup>a</sup>, Lily Khadempour<sup>b</sup>, Rolando D. Moreira-Soto<sup>c</sup>, Kirsten Gotting<sup>a,d</sup>, Adam  
4 J. Book<sup>e</sup>, Adrian A. Pinto-Tomás<sup>f,h</sup>, Ken Keefover-Ring<sup>i</sup>, Cameron R. Currie<sup>a,1</sup>

5 <sup>a</sup>Department of Bacteriology, University of Wisconsin – Madison, Madison, Wisconsin, USA

6 <sup>b</sup>Department of Biology, California State University, Northridge, Northridge, California, USA

7 <sup>c</sup>Sección de Entomología Medica, Departamento de Parasitología, Facultad de Microbiología,  
8 Universidad de Costa Rica, San José, Costa Rica

9 <sup>d</sup>Laboratory of Genetics, University of Wisconsin – Madison, Madison, Wisconsin, USA

10 <sup>e</sup>Exact Sciences, Madison, Wisconsin, USA

11 <sup>f</sup>Centro de Investigación en Estructuras Microscópicas, Universidad de Costa Rica, San José,  
12 Costa Rica

13 <sup>g</sup>Departamento de Bioquímica, Facultad de Medicina, Universidad de Costa Rica, San José,  
14 Costa Rica

15 <sup>h</sup>Centro de Investigación en Biología Celular y Molecular, Universidad de Costa Rica, San José,  
16 Costa Rica

17 <sup>i</sup>Department of Botany and Geography, University of Wisconsin – Madison, Madison,  
18 Wisconsin, USA

19 <sup>1</sup>To whom correspondence may be addressed. Email: [currie@bact.wisc.edu](mailto:currie@bact.wisc.edu)

20 **Keywords:** plant-insect interactions, leaf-cutter ant, attine, detoxification, symbiosis

## 21 Abstract

22 Insects and plants engage in a multitude of complex interactions. In antagonistic cases, such as  
23 herbivory, insects often specialize on a few closely related plant species to overcome physical  
24 and chemical defences. More rarely, herbivorous insects can feed on a range of plant species.  
25 Leaf-cutter ants are generalist herbivores that forage from a variety of plant species, which the  
26 ants bring to the fungus they farm, *Leucoagaricus* sp. While we show that anti-herbivory plant  
27 compounds can harm *Leucoagaricus* sp. *in vitro*, it is unknown how the ants' fungus gardens are  
28 able to incorporate a large diversity of plants with differing plant chemistry. Here, we investigate  
29 the fungus garden bacterial community's ability to degrade plant secondary compounds. We  
30 cultured fungus garden bacteria, sequenced the genomes of 42 isolates, and found genes involved  
31 in plant secondary compound degradation, including monoterpene epsilon-lactone hydrolase.  
32 Some of these genes show *in situ* expression in metatranscriptomes, such as limonene-1,2-  
33 monooxygenase. A majority of the bacterial isolates grew unhindered in the presence of plant  
34 secondary compounds and, using GC-MS, isolates from the genera *Pseudomonas*, *Klebsiella*,  
35 *Enterobacter*, and *Bacillus* could degrade either  $\alpha$ -pinene,  $\beta$ -caryophyllene or linalool.  
36 Additionally, using a headspace sampler, sub-colonies of fungus gardens reduced  $\alpha$ -pinene and  
37 linalool over a 36-hour period, while *Leucoagaricus* sp. strains alone only reduced linalool, not  
38  $\alpha$ -pinene. Our study provides evidence that *Leucoagaricus* sp. has a variable ability to tolerate  
39 and degrade plant secondary compounds, indicating that it may depend on bacteria to detoxify  
40 the diversity of plant chemistry the system encounters.

41

## 42 **Introduction**

43 The struggle between plants trying to avoid consumption and organisms trying to exploit plants  
44 for energy define herbivorous interactions and provide an arena for antagonistic coevolution<sup>1-4</sup>.

45 Herbivorous insects, one of the most well-studied and largest taxa of herbivores, are thought to  
46 have had major impacts on shaping the diversity of the plant world<sup>5,6</sup> and vice versa<sup>2,7</sup>. Plants  
47 have developed physical defences, such as trichomes, surface waxes, or leaf toughness, which  
48 can hinder herbivory. In response, herbivorous insects have morphological and physiological  
49 adaptations for consuming plant matter, such as claws for gripping trichomes<sup>8</sup>, producing  
50 adhesive material to attach to slippery wax layers<sup>9</sup>, and sclerotized mandibles and enlarged head  
51 musculature<sup>10</sup> for feeding on tough plant material.

52 Plants also produce an extraordinarily diverse set of plant secondary compounds (PSC), some of  
53 which are used to deter herbivores<sup>11</sup>. Not only are the chemicals diverse in structure and toxicity,  
54 the mechanisms behind the release of plant chemicals are complex, depending on the type of  
55 damage, the taxon inflicting the damage, the species of plant, and environmental conditions (e.g.  
56 hours of sunlight, temperature, moisture). Additionally, the synthesis, storage, and release of  
57 these compounds are variable, which can affect the rapidity and severity of a plant's response to  
58 herbivory. Some chemical responses are constitutively present, with toxins being slowly released  
59 through open stomata, leaf cuticles, and gland walls. Other chemicals are sequestered in  
60 specialized structures and released upon herbivore damage<sup>12</sup>. Many plant species produce toxins,  
61 like hydrogen cyanide, where the enzyme and substrate involved are compartmentalized  
62 separately. Upon wounding, the two components mix and hydrogen cyanide is released<sup>13</sup>.

63 Finally, chemicals can be released as a direct response to being induced by herbivore or pathogen

64 attack<sup>14</sup>. Herbivorous insects engage in multiple strategies to overcome chemical plant defences,  
65 including harbouring gut microbiota that aid in the detoxification of PSC. Microbes associated  
66 with mountain pine beetles<sup>15–17</sup>, red turpentine beetles<sup>16</sup>, pine weevils<sup>18</sup>, gypsy moths<sup>19</sup>, apple  
67 maggot flies<sup>20</sup>, termites<sup>21</sup>, and coffee berry borers<sup>22</sup> have been found to play an important role in  
68 PSC degradation. The role of gut microbes in PSC detoxification indicates that microbes have  
69 the potential to determine the diet range of herbivorous insects<sup>23</sup>.

70 Leaf-cutter ants are dominant herbivores in most of the Neotropical ecosystems and are able to  
71 forage from a diverse array of plants. In a long-term study, active colonies of two species of leaf-  
72 cutter ants, *Atta colombica* and *Atta cephalotes*, were observed cutting leaves from 67–77% of  
73 all plant species recorded in the foraging area<sup>24</sup>. In a year-long study by Wirth and colleagues<sup>25</sup>,  
74 one colony of *A. colombica* foraged from the leaves or flowers of 126 species, representing 91  
75 genera and 52 families. In mature colonies of *Atta* sp., the ants forage ravenously, forming  
76 massive foraging columns that create distinctive trails over time (Figure 1A). The leaf-cutter ants  
77 do not directly consume the plant substrate, but rather use it to feed *Leucoagaricus* sp.  
78 (*Agaricales*: *Agaricaceae*), the obligate fungal mutualist of the ants. In return, *Leucoagaricus* sp.  
79 degrades the leaf substrate and serves as food for leaf-cutter ants, providing usable energy and  
80 nutrients in the form of specialized hyphal swellings known as gongylidia<sup>26,27</sup>. This process  
81 occurs in structures known as fungus gardens (Figure 1B), which are maintained in underground  
82 chambers. Mature colonies of the genus *Atta* can be composed of hundreds of fungus garden  
83 chambers, supporting the nutrition of millions of larvae, pupae, and emerged workers.

84 The fungus garden, which functionally serves as the ants' external gut, includes the main fungal  
85 symbiont *Leucoagaricus* sp. and a diverse and abundant community of bacteria. In contrast, the  
86 internal gut of leaf-cutter ants has a reduced bacterial community, with adult worker guts

87 containing primarily *Wolbachia* or Mollicutes<sup>28,29</sup>. Culturing, scanning electron microscopy<sup>30</sup>  
88 (Figure 1C), and metagenomics of fungus gardens demonstrate a consistent presence of garden  
89 bacteria and have established a core bacterial community that mostly consists of Proteobacteria,  
90 the majority being in the class Gammaproteobacteria<sup>31–36</sup>. While there is variation in the bacterial  
91 diversity and abundance between colonies and geographic regions, certain bacterial genera are  
92 consistently present and readily cultured, such as *Enterobacter*, *Pseudomonas*, *Pantoea*,  
93 *Klebsiella*, and *Burkholderia*. With the exception of *Klebsiella* and *Pantoea*, which fix nitrogen  
94 for the system<sup>37</sup>, the role of the fungal garden’s bacterial community remains a mystery.  
95 However, metagenomic studies have yielded clues, suggesting several potential roles, including a  
96 likely lead in PSC detoxification<sup>36</sup>.

97 In this study, we examine the ability of garden bacteria from leaf-cutter ants to metabolize PSC.  
98 Focusing on bacteria isolated from fungus gardens of fungus-growing ants collected in Brazil,  
99 we investigate the potential of garden bacteria to tolerate and degrade PSC. First, we isolate  
100 strains of *Leucoagaricus* sp. and determine susceptibility to eight PSC. Then, we sequence the  
101 genomes of 42 isolates of garden bacteria and predict the presence of genes involved in PSC  
102 degradation. Additionally, we analyse previously generated garden bacteria metagenomes,  
103 *Leucoagaricus* sp. genomes, and metatranscriptomes to investigate the presence and expression  
104 of genes involved in PSC degradation. We also expose garden bacteria to eight PSC and  
105 determine susceptibility. Then, using Gas Chromatography-Mass Spectrometry (GC-MS), we  
106 quantify the *in vitro* ability of 15 isolates of garden bacteria to degrade four PSC. Finally, we  
107 measure reduction of two PSC by fungus gardens from our laboratory colonies of *Atta*  
108 *cephalotes* using a headspace sampler coupled to a GC.

## 109 **Results and Discussion**

110 **Sensitivity of *Leucoagaricus* strains to PSC.** Fungi generally have extensive degradative  
111 capabilities<sup>38</sup> and *Leucoagaricus* sp. is known to produce laccases, which are used to treat  
112 incoming plant material and degrade plant phenolic compounds<sup>39</sup>. However, plant phenolics  
113 represent one class of plant chemicals so we tested if *Leucoagaricus* sp. could tolerate eight PSC:  
114  $\alpha$ -pinene,  $\beta$ -caryophyllene, eucalyptol, farnesol, limonene, linalool, *p*-cymene, and terpinolene.  
115 These compounds have been detected in fungus gardens collected in the field<sup>36</sup> and/or are known  
116 to be present in plants observed being foraged by leaf-cutter ants. We focused mostly on  
117 monoterpenes because terpenes often take a prominent place in the profile of blends released by  
118 damaged plants<sup>40</sup>. Five different strains of *Leucoagaricus* sp. from *Atta sexdens*, *Atta laevigata*,  
119 *Atta bisphaerica*, *Atta capiguara*, and *Paratrachymyrmex diversus* colonies were tested for their  
120 ability to grow in the presence of eight different PSC (Figure 2A/B). Of note, while *P. diversus* is  
121 not within the leaf-cutter ant lineage and largely collects substrate like seeds, insect frass, and  
122 dry plant debris for its garden, the species has been observed occasionally collecting fresh leaf  
123 and flower material as substrate for its fungus garden<sup>41,42</sup>. The *Leucoagaricus* sp. from *P.*  
124 *diversus* was the most generally inhibited, with complete growth inhibition from terpinolene,  
125 eucalyptol, linalool, and *p*-cymene, and high inhibition from  $\alpha$ -pinene and limonene. The  
126 *Leucoagaricus* sp. from *P. diversus* and *A. laevigata* colonies were also the only *Leucoagaricus*  
127 sp. that were inhibited by  $\beta$ -caryophyllene, a sesquiterpene. The *Leucoagaricus* sp. from an *A.*  
128 *sexdens* colony also exhibited high sensitivity to PSC, with complete inhibition occurring from  
129 limonene, terpinolene, eucalyptol, and linalool. The *Leucoagaricus* sp. from an *A. capiguara*  
130 colony was the most resistant to the PSC tested, only exhibiting high inhibition in the presence of

131 linalool, while exhibiting low to no inhibition in the presence of the remaining seven compounds  
132 (Figure 2B).

133 Multiple studies have investigated the toxicity of various plant compounds to the fungal cultivars  
134 of leaf-cutter ants<sup>43–46</sup>. LaPointe *et al.*<sup>45</sup> isolated *Leucoagaricus* sp. from *Acromyrmex landolti* (a  
135 species in the other genus of leaf-cutter ants) and *A. laevigata* and found that growth of the  
136 isolates was reduced when grown on agar with aqueous plant extract or leaf homogenate  
137 compared to growth of the fungus on agar alone. In another study by Howard *et al.*<sup>46</sup>, four  
138 terpenoids were tested for potential toxic effects against *Leucoagaricus* sp. from *A. cephalotes*  
139 and found that the four compounds had variable effects on fungal growth with certain  
140 compounds having little/no effect and others inhibiting the fungus greatly. Our results, combined  
141 with previous studies, suggest that the fungal cultivars of fungus-growing ants have varying  
142 levels of resistance to PSC, indicating that other microbes may be involved in detoxification.

143 **Gene content of bacterial isolates, garden bacteria metagenomes, garden**  
144 **metatranscriptomes, and *Leucoagaricus* sp.** As the fungus garden is the external gut of leaf-  
145 cutter ants, the fungus gardens' microbiome likely fills roles similar to other gut microbiomes,  
146 including helping detoxify PSC. Taking advantage of the external and aerobic nature of the leaf-  
147 cutter ant fungal “gut”, we cultured and sequenced bacteria from fungus gardens and tested the  
148 potential of isolates to degrade PSC. Garden bacteria were isolated from multiple fungus gardens  
149 of the two genera of leaf-cutter ants, *Atta* sp. and *Acromyrmex* sp., as well as three genera of  
150 other fungus-growing ants, *Paratrachymyrmex* sp., *Cyphomyrmex* sp., and *Apterostigma* sp.,  
151 collected in Brazil (Table S1). After obtaining pure isolates, 42 bacterial genomes were  
152 sequenced (Table S2), including genera from both abundant and consistent genera (e.g.,  
153 *Pseudomonas*, *Enterobacter*), as well as more sparse genera (e.g., *Chitinophaga*, *Bacillus*). To

154 assess the *in silico* potential of the 42 isolates for PSC degradation, we analysed the genomes  
155 (Figure 3A) for the presence of the diterpene degradation pathway<sup>47</sup>, the cymene pathway  
156 (ko1220:module 00419), the saxA gene, the  $\alpha$ -pinene/limonene degradation pathway (ko00903),  
157 the geraniol pathway (ko00281), the cumate pathway (ko01220: module 00539), the trans-  
158 cinnamate pathway (ko1220:module 00545), 20 cytochrome p450s known to be involved in the  
159 microbial transformation of PSC<sup>48</sup>, and the squalene hopene cyclase gene (shc) (Dataset S1,  
160 Dataset S2). In addition to the 42 isolate genomes, we used the same genes and pathways to  
161 analyse 12 existing fungus garden bacteria metagenomes from Brazil (Dataset S1, Dataset S2),  
162 metatranscriptome data generated from the top portions of field-collected fungus gardens from  
163 two *Atta cephalotes* colonies and one *Atta colombica* colony (Table S3, Table S4), and two  
164 published genomes of *Leucoagaricus* sp. strains (Dataset S1, Dataset S2).

165 No genes belonging to the diterpene degradation cluster, the cymene pathway, or saxA were  
166 found in the 42 bacterial isolates analysed (Dataset S1, Dataset S2). However, the metagenome  
167 annotation did predict the presence of the cymene degradation pathway: one metagenome had  
168 the complete pathway, two metagenomes had  $\frac{3}{4}$  of the pathway, five metagenomes had one gene  
169 from the pathway, and the remaining four had none of the genes (Dataset S2).

170 The  $\alpha$ -pinene/limonene degradation pathway and geraniol pathway shared three genes between  
171 the two pathways: K01692 (enoyl-CoA hydratase), K01825 (fadB, 3-hydroxyacyl-CoA  
172 dehydrogenase), and K01782 (fadJ, 3-hydroxyacyl-CoA dehydrogenase). All isolates had at least  
173 one out of three shared genes, while one *Pantoea*, *Klebsiella*, *Enterobacter*, and *Acinetobacter*  
174 had all three. For the unique genes in the pathways (9 genes out of 12 for  $\alpha$ -pinene/limonene and  
175 12 genes out of 15 for geraniol), four of seven *Enterobacter* isolates had the highest proportion  
176 of unique  $\alpha$ -pinene/limonene genes at 22%. All *Burkholderia* isolates, the *Acinetobacter* isolate,



177 four of seven *Enterobacter* isolates, one of four *Klebsiella* isolates, and one of 10 *Pantoea*  
178 isolates were predicted to contain the monoterpene epsilon-lactone hydrolase gene (K14731),  
179 which is involved in monocyclic monoterpene degradation<sup>49</sup>. Most isolates also contained an  
180 aldehyde dehydrogenase (K00128) involved in the  $\alpha$ -pinene/limonene degradation pathway  
181 (Figure 3A). In the 12 metagenomes, the proportion of genes present from the  $\alpha$ -  
182 pinene/limonene pathway ranged from 22% to 56% (Dataset S2). Additionally, we detected the  
183 expression of certain genes in the  $\alpha$ -pinene/limonene pathway in the metatranscriptomic dataset  
184 (Table S4, Figure S2A). In the first *A. cephalotes* colony (FG1), we detected 33% of the  $\alpha$ -  
185 pinene/limonene pathway in a range of 0.506-2831 transcripts per million (TPM), and all three  
186 shared genes in a range of 0.337-3.051 TPM. Of note, we detected limonene 1,2-monoxygenase  
187 (K14733) expression at 0.506 TPM, which is the first step of limonene transformation. In the  
188 second *A. cephalotes* colony (FG2), we detected 22% of the  $\alpha$ -pinene/limonene pathway with  
189 59.99 TPM and 3724 TPM, and all three shared genes in a range of 0.168-11.54 TPM. In the *A.*  
190 *colombica* colony (FG3), we detected 22%  $\alpha$ -pinene/limonene pathway with 9.062 TPM and  
191 2238 TPM, and one of the shared genes with 4.178 TPM. In all three metatranscriptomes  
192 monoterpene epsilon-lactone hydrolase (K14731) was expressed, reflecting its presence in the  
193 individual bacterial isolate genomes and confirming the gene's expression *in situ*.

194 For the unique genes in the geraniol pathway, *Acinetobacter* had the highest proportion of genes  
195 at 75%, while most other isolates were predicted to have between 8% and 17% of genes (Figure  
196 3A). *Acinetobacter* contained all the genes except for the geraniol dehydrogenase (K19653,  
197 K17832) and one of the 3-hydroxyacyl-CoA dehydrogenases (K00022). The other isolates were  
198 predicted to have hydroxymethylglutaryl-CoA lyase and acetyl-CoA acyltransferase, in addition  
199 to the shared genes described above. In the metagenomic dataset, the proportion of completeness

200 for the geraniol degradation pathway was between 17% and 75% (Dataset S2). In the  
201 metatranscriptomic dataset (Table S4, Figure S2A), we found that FG1 expressed 50% of the  
202 geraniol pathway in a range of 0.115-25.47 TPM, including citronellol dehydrogenase (K13774)  
203 at 0.147 TPM, which is involved in the first step of geraniol and citronellol transformation. In  
204 FG2, we detected 42% of the geraniol pathway in a range of 0.033-27.18 TPM and in FG3, we  
205 detected 16% of the geraniol pathway with 1.334 TPM and 9.208 TPM.

206 Ten of the isolates contained one gene from the cumate pathway, with seven *Burkholderia* and  
207 two *Pseudomonas* isolates predicted to contain different components of the p-cumate 2,3-  
208 dioxygenase enzyme (K16303 or K16304) and one *Pantoea* isolate predicted to have 2,3-  
209 dihydroxy-p-cumate/2,3-dihydroxybenzoate 3,4-dioxygenase (K10621). On the other hand, more  
210 isolates had genes involved in the trans-cinnamate transformation pathway. Ten of twelve  
211 *Burkholderia*, all *Klebsiella*, and one of three *Pseudomonas* isolates had at least 50% of the  
212 genes necessary for cinnamate degradation (Figure 3A). Not all of the genes are necessary for a  
213 complete pathway, as there are two routes from trans-cinnamate to trans-2,3-dihydroxy-  
214 cinnamate. In the metagenomes, cumate and trans-cinnamate pathways had a range of 0%-100%  
215 and 50%-80% completeness, respectively (Dataset S2). We did not detect the expression of  
216 genes from these pathways in the metatranscriptomic dataset.

217 Twenty cytochrome p450s known to be involved in isoprenoid transformation were analyzed<sup>48</sup>.  
218 Most of the cytochrome p450s were not detected in the 42 bacterial isolates tested (Dataset S1).  
219 However, four cytochrome p450s were predicted to be present: CYP102A1, CYP106A2,  
220 CYP107H, and CYP108. CYP102A1 was detected in four out of 12 *Burkholderia* isolates, but  
221 none of the other genera (Figure 3A). CYP102A1 functions as a fatty acid hydroxylase and small  
222 mutations can result in the catalysis of oxidation of substances such as terpenes<sup>50</sup>. CYP106A2

223 was detected in *Bacillus* (ICBG1751) and is known to be a steroid hydroxylase, as well as a  
224 bacterial diterpene hydroxylase<sup>51</sup>. CYP107H and CYP108 were both detected in one *Pantoea*  
225 isolate (ICBG870). CYP107H is involved in a pathway that cleaves fatty acyl chains for biotin  
226 biosynthesis, while CYP108 is involved in  $\alpha$ -terpineol hydroxylation<sup>52</sup>. We saw an increase in  
227 the amount of cytochrome p450s predicted to be present in the metagenomes, including CYP111,  
228 which catalyses the 8-methyl hydroxylation of linalool<sup>53</sup>. The other cytochrome p450s detected  
229 only in the metagenomes were CYP105A3, CYP101, CYP105A1 (Dataset S1), responsible for  
230 hydroxylation of compactin<sup>54</sup>, oxidation of camphor<sup>55</sup>, and hydroxylation of vitamin D3<sup>56</sup> and  
231 diterpene resin acids<sup>7</sup>, respectively. We also detected the cytochrome p450s described above in  
232 the individual bacterial genomes: CYP102A1, CYP107H, CYP106A2, and CYP108 (Dataset  
233 S1). We did not detect the expression of these 20 cytochrome p450s in the metatranscriptomic  
234 dataset.

235 Squalene-hopene cyclase (shc) is responsible for synthesizing hopanoids, which integrate into  
236 biological membranes and increase structural order, resulting in a reduction of permeability and  
237 an increase in stability of bacterial membranes<sup>58</sup>. The presence of this enzyme in garden bacteria  
238 isolates could explain the ability to tolerate stressful conditions, such as growth in the presence  
239 of PSC. All *Burkholderia* isolates and the *Asaia* isolate are predicted to have squalene-hopene  
240 cyclase, while none of the other isolates were predicted to contain this gene (Figure 3A). shc was  
241 detected in 11/12 metagenomes (Dataset S1).

242 In addition to the garden bacteria genomes, metagenomes, and metatranscriptomes, we analyzed  
243 two existing *Leucoagaricus* sp. for the same PSC degradation pathways. Overall, the two  
244 genomes, one from *Atta cephalotes* (*Leucoagaricus* sp. [Ac12]) and one from *Cyphomyrmex*  
245 *costatus* (*Leucoagaricus* sp. [SymC.cos]), lacked most of the gene sets analyzed (Dataset S1,

246 Dataset S2). This could be partially due to most of the genes used for annotation being of  
247 bacterial origin and so the annotation did not lend itself well to fungal genomes.

248 The presence of cytochrome p450s,  $\alpha$ -pinene/limonene degradation genes, geraniol degradation  
249 genes, cumate degradation genes, trans-cinnamate degradation genes, *p*-cymene degradation  
250 genes, and squalene-hopene cyclase indicate that garden bacteria may be able to metabolize PSC,  
251 or at least survive in the presence of PSC. With the data available we were able to predict that  
252 both individual garden bacteria isolates and garden bacteria metagenomes contained the genes  
253 necessary to degrade or transform PSC that could harm the fungus gardens. Additionally, the  
254 higher completeness of pathways observed in the metagenomes suggests that while individual  
255 strains may not have the entire pathway for the degradation of a compound, as a community,  
256 garden bacteria have the capabilities to reduce PSC within the fungus garden. The  
257 metatranscriptomic dataset supports this hypothesis, as we found expression of genes involved in  
258  $\alpha$ -pinene/limonene and geraniol degradation. These metatranscriptomes came directly from field  
259 gardens, indicating that bacteria in fungus gardens in the natural environment are actively  
260 expressing genes involved in PSC/monoterpene degradation. In combination with the lack of  
261 genes predicted in *Leucoagaricus* sp. genomes within these pathways, we infer that fungus  
262 garden bacteria could be involved in detoxifying PSC based on their genomic content.

263 **Bacterial tolerance of PSC.** In addition to *in silico* analyses of the garden bacteria isolates, we  
264 assessed their tolerance by exposing garden bacteria isolates to the eight PSC described above  
265 (Figure 3B). Most bacterial isolates were able to grow uninhibited in the presence of a high  
266 concentration of the different compounds. Linalool was the most inhibitory against the bacterial  
267 isolates, causing some degree of inhibition against all isolates except *Pseudomonas* and three  
268 *Burkholderia* isolates. While none of the isolates were predicted to contain genes involved in the

269 degradation pathway, all isolates except for *Acinetobacter* and *Bacillus* were completely resistant  
270 to *p*-cymene, perhaps due to an alternative to degradation, such as efflux pumps. Farnesol,  $\beta$ -  
271 caryophyllene, and terpinolene did not inhibit the majority of bacterial isolates, causing small  
272 zones of inhibition in the *Bacillus* isolate as well as one to two other isolates.  $\alpha$ -pinene and  
273 limonene caused slightly more inhibition, especially in *Bacillus* and two *Klebsiella* isolates, but  
274 most bacteria were resistant or only slightly susceptible to these two compounds. These trends  
275 were also seen in a larger set of samples (Figure S1). Like the tolerance of *Leucoagaricus* sp.,  
276 bacterial isolates have varying susceptibilities to PSC.

277 ***in vitro* degradation of PSC by bacterial isolates.** Fifteen bacterial isolates that represent the  
278 diversity of garden bacteria across multiple fungus-farming ant lineages, as well as mostly being  
279 from genera that are consistently abundant between fungus gardens, were grown in liquid culture  
280 supplemented with one of four PSC ( $\alpha$ -pinene,  $\beta$ -caryophyllene, eucalyptol or linalool) and  
281 degradation was assessed with GC-MS. To account for isolates unable to grow in the presence of  
282 certain PSC, we grew all bacterial isolates in two ways: (A) adding the compound during  
283 exponential phase (Figure 4) and (B) adding the compound after stationary phase (Figure S3). All  
284 *Enterobacter* isolates (ICBG810,  $p=0.0004$ ; ICBG643,  $p=0.0018$ ; ICBG832,  $p=0.0062$ )  
285 significantly reduced  $\alpha$ -pinene (*t*-test, Bonferroni correction:  $\alpha=.0033$ ) during exponential growth.  
286 Also, one of two *Klebsiella* isolates (ICBG873,  $p=0.0026$ ) and one of two *Bacillus* isolates  
287 (ICBG1751,  $p=0.0008$ ) significantly reduced  $\alpha$ -pinene. Additionally, other bacterial isolates  
288 showed a varying range of reductions of  $\alpha$ -pinene between vials, resulting in large variability and  
289 lack of significance with the Bonferroni corrected alpha-value. No isolates significantly reduced  
290  $\alpha$ -pinene within stationary growth. One of three *Pseudomonas* isolates (ICBG639,  $p<0.0001$ )  
291 significantly reduced  $\beta$ -caryophyllene in the exponential environment. The same *Pseudomonas*

292 isolate (ICBG639,  $p=0.0014$ ) also significantly reduced  $\beta$ -caryophyllene at the stationary phase.  
293 Linalool was reduced by two isolates, *Burkholderia* (ICBG637; exponential  $p=0.0036$ , stationary  
294  $p=0.0008$ ) and *Pseudomonas* (ICBG967; exponential  $p=0.0020$ , stationary  $p=0.0024$ ). Finally,  
295 eucalyptol, the fourth compound tested, was not reduced by any of the isolates tested (Figure S4).  
296 In all cases, no breakdown products were detected by GC-MS, which could be due to complete  
297 degradation of the compounds into components of central metabolism<sup>59,60</sup>.

298 Some genera isolated, such as *Pseudomonas* and *Burkholderia*, have been implicated in plant  
299 compound degradation in other systems, such as in bark beetles and mountain pine beetles<sup>16,61</sup>. In  
300 the current study, two isolates of *Pseudomonas* were found to significantly reduce either  $\beta$ -  
301 caryophyllene or linalool *in vitro*. In addition to *Pseudomonas*, in the bark beetle system, *Serratia*  
302 isolates were able to reduce 3-carene and (-)- $\beta$ -pinene and *Rahnella* isolates were able to reduce  
303 3-carene, (-)- $\alpha$ -pinene, (+)- $\alpha$ -pinene and (-)- $\beta$ -pinene<sup>16</sup>. While *Serratia* and *Rahnella* were not  
304 cultured in our study, metagenomic and culturing studies from fungus gardens of leaf-cutter ants  
305 have detected *Serratia* (Figure S5) and *Rahnella*<sup>32,33,36</sup>, suggesting that other isolates within fungus  
306 garden bacterial communities could be involved in metabolizing PSC that simply were not tested  
307 in this study.

308 **Fungus gardens exposed to  $\alpha$ -pinene or linalool did not experience a shift in bacterial**  
309 **community composition.** We exposed sub-colonies of *Atta cephalotes* to a low and high dose of  
310  $\alpha$ -pinene or linalool for 48 hours and then extracted bacterial DNA for 16S rRNA amplicon  
311 sequencing to determine if there was a shift in bacterial community, as previously observed for  
312 mammalian herbivore gut microbiomes<sup>62</sup>. At the doses and exposure tested, we did not see a  
313 change in abundance of certain expected community members known to degrade PSC (i.e.,  
314 *Pseudomonas*), compared to the control sub-colonies (data not shown). However, the bacterial

315 genera observed are the same as genera observed from the fungus gardens of leaf-cutter ants  
316 collected and immediately processed in the field<sup>31-33,36</sup> (Figure S5). The colonies used in the  
317 experiments have been in lab for approximately 7 years (RM120223-02), 5 years (CR14) and 1  
318 year (CF180406-01, CF180405-02, HH180403-03), which indicates that fungus garden bacterial  
319 members – at the genus-level – are maintained even with a large change in environment: tropical  
320 rainforest in Costa Rica to a controlled lab setting in Wisconsin. Specifically, we confirmed that  
321 the genera we cultured directly in the field for our *in vitro* assays were found in our laboratory  
322 colonies. All isolates tested in the GC-MS experiment that had been cultured from the Brazil  
323 colonies were detected in the 16S data except for *Bacillus* (i.e. *Burkholderia*, *Pantoea*,  
324 *Pseudomonas*, *Enterobacter*, and *Klebsiella* were present at varying abundances (Figure S5B).  
325 For our subsequent experiments (described below), this means we can assume that our results are  
326 relatable to environmental fungus gardens.

327 **Degradation of  $\alpha$ -pinene and linalool by *Atta cephalotes* fungus gardens.** To examine if our  
328 *in vitro* determination of PSC tolerance and reduction reflects an *in vivo* role in fungus garden  
329 and the associated bacteria's behaviour in the environment, we use sub-colonies of fungus  
330 gardens from *Atta cephalotes* colonies and measured headspace concentrations of two PSC,  $\alpha$ -  
331 pinene and linalool (i.e., the compounds that were degraded by garden bacteria and largely  
332 inhibited *Leucoagaricus* growth). The headspace of the control vials was compared to the  
333 headspace of vials containing fungus gardens and compound. When sub-colonies from three *A.*  
334 *cephalotes* colonies were exposed to  $\alpha$ -pinene (Figure 5A), there was significant reduction of  $\alpha$ -  
335 pinene in the fungus garden samples at 12 hours (only  $\alpha$ -pinene vs fungus garden +  $\alpha$ -pinene,  
336  $p < 0.0001$ ; cotton +  $\alpha$ -pinene vs fungus garden +  $\alpha$ -pinene,  $p = 0.1191$ ), 24 hours (only  $\alpha$ -pinene  
337 vs fungus garden +  $\alpha$ -pinene,  $p < 0.0001$ ; cotton +  $\alpha$ -pinene vs fungus garden +  $\alpha$ -pinene,



338  $p < 0.0001$ ) and 36 hours (only  $\alpha$ -pinene vs fungus garden +  $\alpha$ -pinene,  $p < 0.0001$ ; cotton +  $\alpha$ -  
339 pinene vs fungus garden +  $\alpha$ -pinene,  $p < 0.0001$ ), compared to most control vials (mixed  
340 regression model with time and treatment as fixed effects and ant colony as random effects,  $\alpha =$   
341 0.05). Additionally, the 36-hour sub-colonies had significantly reduced  $\alpha$ -pinene compared to  
342 the 12-hour sub-colonies ( $p < 0.0001$ ) and the 24-hour sub-colonies ( $p < 0.0001$ ), suggesting active  
343 metabolizing by the fungus garden over this time period. *Leucoagaricus* sp. strains were also  
344 tested in a similar fashion. Vials containing *Leucoagaricus* sp. were exposed to  $\alpha$ -pinene and the  
345 headspace was measured after 36 hours of exposure (Figure 5B). Compared to the control vials,  
346 *Leucoagaricus* sp. strains did not reduce  $\alpha$ -pinene significantly ( $p = 0.2786$ , Welch two sample  $t$ -  
347 test).

348 When sub-colonies from five *A. cephalotes* colonies were exposed to linalool (Figure S6A),  
349 there was a significant reduction of linalool in the headspace between controls and 12-hour sub-  
350 colonies (only linalool vs fungus garden + linalool,  $p < 0.0001$ ; cotton + linalool vs fungus garden  
351 + linalool,  $p = 0.0728$ ), 24-hour sub-colonies (only linalool vs fungus garden + linalool,  $p < 0.0001$ ;  
352 cotton + linalool vs fungus garden + linalool,  $p = .0021$ ), and 36-hour sub-colonies (only linalool  
353 vs fungus garden + linalool,  $p < 0.0001$ ; cotton + linalool vs fungus garden + linalool,  $p = 0.0049$ ).  
354 However, we do not see any significant differences between the 12-hour, 24-hour, and 36-hour  
355 linalool amounts, suggesting there may be a limit to the degradation possible with this compound  
356 that was reached at 12 hours post-exposure. For the headspace sampling with *Leucoagaricus* sp.,  
357 linalool was significantly reduced ( $p = 0.0036$ , Welch two sample  $t$ -test), which was surprising  
358 due to the high inhibition by this compound in the plate assay (Figure 2B, Figure S6B). This  
359 could be due to a difference in dosage, which has been shown to have an effect on bacterial  
360 tolerance and degradation of PSC<sup>17</sup>. The tolerance assays contained high amounts of compound,



361 whereas the headspace sampling had lower amounts of compound and *Leucoagaricus* sp. was  
362 allowed to obtain a higher biomass (grown for longer on PDA). Additionally, while we saw  
363 significant reduction of linalool by *Leucoagaricus* sp., strains from CF180405-02, CF180406-01,  
364 and AB1 had linalool amounts that were encompassed by the amount found in the control.  
365 Therefore, we conclude that *Leucoagaricus* sp. has variable abilities to tolerate and degrade  
366 common PSC at the strain level. Overall, the observed reductions of PSC indicate that the fungus  
367 gardens of leaf-cutter ants have the capability to reduce PSC that enter the system and  
368 *Leucoagaricus* sp. may depend on other microbes to aid in detoxifying these compounds.

369 **Conclusions.** In addition to the important morphological and physiological features of insects  
370 and plants, both organisms form symbioses with microorganisms to outcompete one another. In  
371 herbivorous insect systems, gut bacteria can be imperative in determining the plant range of its  
372 host. This study shows that bacteria associated with the fungus gardens of leaf-cutter ants can  
373 metabolize PSC, potentially enabling leaf-cutter ants to forage from a greater variety of plant  
374 sources. While earlier work with metagenomic sequencing in leaf-cutter ant fungus gardens  
375 showed the potential of the bacteria to degrade anti-herbivory compounds, our work combines *in*  
376 *silico*, *in vitro*, and *in vivo* evidence that indicates that garden bacteria can degrade PSC, some of  
377 which may otherwise inhibit the growth of *Leucoagaricus* sp. Like other herbivorous insect  
378 systems, the gut microbiome of leaf-cutter ants is demonstrably important for dictating palatable  
379 plant substrate, with the unique feature of the ants' gut being external in the form of fungus  
380 gardens. Overall, this study demonstrates the intricacy and nuance with which microbes serve as  
381 an interface between herbivores and the plants they consume.

382

## 383 **Materials and Methods**

384 **Fungal tolerance assay.** We selected compounds for testing based on leaf extracts from plant  
385 families that have been foraged by leaf-cutter ants<sup>25</sup>, detection of terpenes in fungus gardens of  
386 *Atta laevigata*<sup>36</sup>, and commercial availability: 98% (1R)-(+)- $\alpha$ -pinene (Acros Organics), >90%  
387  $\beta$ -caryophyllene (TCI), 99% eucalyptol (Sigma-Aldrich), 95% farnesol(Sigma-Aldrich), 96%(S)-  
388 (-)- limonene (Sigma-Aldrich), 97% linalool (48.2% (R)-(-)-linalool/51.8% (S)-(+)-linalool)  
389 (Sigma-Aldrich), 99+% *p*-cymene (Acros Organics), and 85% terpinolene (Sigma-Aldrich). The  
390 eight PSC were tested against five strains of fungal cultivar from *Atta sexdens*, *Atta laevigata*,  
391 *Atta bisphaerica*, *Atta capiguara*, and *Paratrachymyrmex diversus* colonies (isolation  
392 information in Table S1). A 6 mm fungal plug of *Leucoagaricus* sp. was put onto a 60 mm  
393 Oxoid Malt Extract Agar (OMEA; per L: 30 g malt extract, 5 g mycological peptone, 15 g agar)  
394 plate and allowed to grow for two weeks. Then, for each PSC, the cultivar was exposed to a  
395 sterile disc with 15  $\mu$ L of compound that had been allowed to dry in a biological safety hood for  
396 five min. The edges of fungal growth and the edge of the disc were 1 cm apart. Each compound  
397 was done in triplicate (three plates per plant defence compound per cultivar) and inhibition was  
398 monitored over the course of two weeks, with pictures being taken on day 2 and 14. Inhibition  
399 was determined by a qualitative scale where 0 =no inhibition, 1=no/slight inhibition at day 2 and  
400 resume normal growth by day 14(compared to control), 2=no/slight inhibition at day 2 and  
401 resume slow growth by day 14 (compared to control), 3= mostly inhibited by day 2, no  
402 additional growth by day 14, 4=complete inhibition at day 2 and day 14 (Figure 2A).

403 **Sampling and bacterial isolations.** Fungus-farming ant colonies were collected in January 2017  
404 in the following general locations: Anavilhanas, AM; Ducke Reserve, AM; Itatiaia, RJ;  
405 Botucatu, São Paulo State; Ribeirão Preto, São Paulo State. Details regarding the exact GPS

406 coordinates and environment of the samples can be found in Table S1. In lab, pure isolates were  
407 obtained after several rounds of subculturing based on morphology. A total of 317 isolates were  
408 obtained. We identified 117 isolates to genus-level by 16S rRNA sequencing as previously  
409 described<sup>63</sup>. Briefly, colonies were lysed and PCR was performed with 16S rRNA primers 27F  
410 (5'- GAG AGT TTG ATC CTG GCT CAG-3') and 1492R (5'-GGT TAC CTT GTT ACG ACT  
411 T-3'). Samples were sequenced using Sanger sequencing at the University of Wisconsin –  
412 Madison Biotech Center (Madison, WI) and analysed using 4Peaks and CLC Sequence Viewer  
413 7. The 16S rRNA gene sequence were matched using BLAST<sup>64</sup> and the SILVA database  
414 (<https://www.arb-silva.de>) for the nearest genus-level identification.

415 **DNA Extraction, Assembly, and Annotation.** DNA from 42 bacterial isolates was extracted  
416 using the Promega Wizard Genomic DNA Purification Kit using the Gram-Negative and Gram-  
417 Positive Bacteria Protocol. Quality control was done using Qubit BR dsDNA kit (Invitrogen,  
418 USA). Genomic DNA libraries for Illumina MiSeq 2x300bp paired-end sequencing were  
419 prepared by the University of Wisconsin- Madison Biotechnology Center. Reads were corrected  
420 with MUSKETv1.1, paired-ends were merged with FLASH v1.2.7, and assembled with SPAdes  
421 3.11.0. Genome statistics can be found in Table S2. Species-level identification was determined  
422 by uploading the genomes to JSpeciesSW, performing a Tetra Correlation Search, and taking the  
423 first result. If there were conflicts in the top 5 results (i.e. different genera), the top 5 genomes  
424 were pulled and ANI with pyani ([github.com/widdowquinn/pyani](https://github.com/widdowquinn/pyani)) using the ANIm analysis was  
425 performed. Then, the genome with the highest percent similarity was selected as our isolate's  
426 taxonomic status. Predicted proteins putatively involved in PSC degradation were identified from  
427 each genome in one of two ways: 1) Using the Kyoto Encyclopedia of Genes and Genomes  
428 (KEGG) Automatic Annotation Server (KAAS). Specifically, genes encoding enzymes

429 putatively involved in monoterpene degradation or aromatic compound degradation, as defined  
430 in the KEGG limonene and  $\alpha$ -pinene degradation pathway (ko00903), geraniol degradation  
431 (ko00281), degradation of aromatic compounds (ko01220, modules 00419,00539, 00545) were  
432 investigated after annotation. 2) DIAMOND v0.9.21.122<sup>65</sup> BLASTP against the Uniprot Swiss-  
433 Prot and TrEMBL databases ([www.uniprot.org/downloads](http://www.uniprot.org/downloads)), downloaded on July 18, 2019. We  
434 only kept the top 5% of hits (--top 5) that had an e-value below 1e-05 for each query sequence.  
435 Then, using the grep command, we looked for the following Uniprot accession numbers that  
436 corresponded to cytochrome p450s: P00183, P14779, Q2L6S8, P18326, Q59079, Q59831,  
437 Q06069, P53554, P33006, U5U1Z3, A9F9S4, Q59723, Q59990, Q9K498, Q53W59, Q8VQF6,  
438 A9FZ85, Q88LH7, Q88LH5, Q88LI2, Q65A64; the 20 genes in the diterpene degradation  
439 cluster: Q9X4W9, Q9X4W8, Q9X4X8, Q9X4X7, Q9X4X6, Q9X4X5, Q9X4X4, Q9X4X2,  
440 Q9X4X1, Q9X4X0, Q9X4W7, Q9X4W6, Q7BRJ3, Q7BRJ4, Q7BRJ5, Q7BRJ6, Q7BRJ7,  
441 Q7BRJ8, Q7BRJ9, Q9X4X; saxA: A0A0N7FW12; squalene-hopene cyclase: P33990, P54924,  
442 P33247. We also performed DIAMOND BLASTP using a custom database with solely these  
443 gene sequences with a query coverage cut-off of 75% (--query-cover 75) and e-value cut-off of  
444 1E-05. If there was alignment in both the Uniprot analysis and the custom analysis, then genes  
445 were predicted to be present. The annotation methods were used on individual bacterial  
446 genomes, two publicly available *Leucoagaricus* sp. genomes (BioProject: PRJNA179280 and  
447 PRJNA295288), and the publicly available leaf-cutter ant garden bacteria metagenomes from  
448 Brazil (Gold Analysis Project ID: Ga0157357 – Ga0157368). For the metagenomes, we used the  
449 metagenomes KAAS option instead of the complete/draft genome KAAS option.

450 **Metatranscriptomic sequencing of fungus gardens.** Samples were collected directly from the  
451 field into RNAlater buffer. Samples were taken from the top sections of three different colonies:

452 two *Atta cephalotes* colonies from La Selva and one *Atta colombica* colony from Golfito (Table  
453 S3). Total RNA extraction was identical to a method previously described<sup>66</sup>. cDNA library  
454 construction and Illumina HiSeq2000 sequencing were performed at the University of Wisconsin  
455 Biotechnology Center (Madison, WI). Metatranscriptomes were uploaded to MG-RAST and  
456 processed with their SOP<sup>67</sup>. We downloaded the reads post-processing (quality reads) and then  
457 metatranscriptomes were analysed using prodigal V2.6.2, DIAMOND v0.9.21.122, and kallisto  
458 v. 0.43.1<sup>68</sup>. First, we ran prodigal on the assembled *fna* files of the garden bacteria metagenomes  
459 (downloaded from JGI) with the metagenomic flag (-p meta). Then, a kallisto index was created  
460 with all of the combined prodigal garden bacteria metagenome output. The kallisto quant  
461 command was used to pseudo-align the garden bacteria index against the metatranscriptome  
462 reads. This gave a transcripts per million (TPM) value of bacterial transcripts in the  
463 metatranscriptome. Then, we used DIAMOND to blastp the metagenome coding regions against  
464 the Uniprot and KEGG databases described above. Using grep, we found the genes of interest  
465 (same as in the bacteria isolate annotation) and connected the gene of interest, the metagenomic  
466 transcript it mapped to, and the TPM in the metatranscriptome. For genes with multiple  
467 transcripts and different TPMs, we recorded the unique values (Figure S2) and summed the  
468 TPMs for total expression (Table S4). We also did the same workflow for four housekeeping  
469 genes (*gyrB*: K02470, *rpoB*: K03043, *rpoD/sigA*: K02086, *rpsL*: K02950).

470 ***in vitro* garden bacterial tolerance.** We tested the effect of the eight PSC on 46 bacterial  
471 isolates using Whatman 6mm discs. Bacterial isolates were grown overnight (16-24 hours) until  
472 turbid (OD<sub>600</sub> ~1-2). 100µL of overnight culture was spread and plated on Yeast Malt Extract  
473 Agar (YMEA; per L: 4 g yeast extract, 10 g malt extract, 4 g dextrose, 15 g agar). A disc with  
474 15µL of PSC was deposited in the center of the bacterial lawn. Each PSC was done in triplicate

475 (3 plates per plate secondary compound per bacterial isolate). After 48 hours, pictures were taken  
476 of the plates using an Epson scanner and then uploaded into Fiji<sup>69</sup>. Fiji Version 1.0 was used to  
477 measure the zones of inhibition caused by each PSC (in centimetres). The average of the three  
478 zones of inhibition was calculated. The zones of inhibition were all scaled in reference to the  
479 largest zone observed so that 0 indicates inhibition (zone of inhibition = 3cm) and 1 indicates no  
480 inhibition (100% growth; zone of inhibition = 0cm)

481 **Gas Chromatography-Mass Spectrometry (GC-MS) of bacterial isolates incubated with**  
482 **PSC.** Bacterial isolates were prepared two ways for GC-MS: addition of compound during  
483 exponential growth or stationary growth. For both methods, bacterial isolates were grown  
484 overnight (16-24 hours) in 10% tryptic soy broth (TSB). All shaking was done at 300 rpm at  
485 room temperature. All experiments included an extra vial to read the OD<sub>600</sub> to ensure bacterial  
486 growth in the presence of compound, which also served to confirm earlier patterns of compound  
487 tolerance by bacterial isolates (data not shown). *(A) Exponential phase* The OD<sub>600</sub> was taken to  
488 calculate how much overnight culture would be needed to reach an OD<sub>600</sub> of 0.08 (i.e.  $C_1V_1 =$   
489  $(0.08)(1 \text{ mL})$ ). The appropriate amount of overnight culture was inoculated into vials containing  
490 10% TSB and 2.5  $\mu\text{L/mL}$  of one of four PSC,  $\alpha$ -pinene,  $\beta$ -caryophyllene, eucalyptol, linalool,  
491 that were added using a glass manual GC syringe (10  $\mu\text{L}$ , Thermo Scientific). The bacterial cells  
492 and plant compound were left shaking for another two days at room temperature. This was done  
493 with 15 bacterial isolates representing six genera, as well as negative controls (no bacteria), in  
494 triplicate (16 x 4 compounds x 3 replicates). *(B) Stationary phase* 10  $\mu\text{L}$  of overnight culture  
495 was pipetted into 987.5  $\mu\text{L}$  of 10% TSB in vials. After two days of incubation at room  
496 temperature while shaking at 300 rpm, 2.5  $\mu\text{L/mL}$  of one of four PSC ( $\alpha$ -pinene,  $\beta$ -  
497 caryophyllene, eucalyptol, linalool) were added directly to the vials using a glass manual GC

498 syringe (10  $\mu$ L, Thermo Scientific). Then, the bacterial cells and plant compound were left  
499 shaking for another two days at room temperature. This was done with the same number of  
500 samples listed above.

501 For both method A and B, PSC were extracted by pipetting 1mL of hexane into each vial and  
502 shaking the vials overnight. After the phase were allowed to separate, 500  $\mu$ L of the hexane-PSC  
503 phase was removed and put into new vials containing 500  $\mu$ L hexane and 5  $\mu$ L/mL toluene (as  
504 the internal standard). We then analysed the abundance of each PSC using GC-MS. Specifically,  
505 the GC system consisted of a Thermo Fisher Trace 1310 Gas Chromatograph coupled with  
506 Thermo ISQ LT Single Quadrupole Spectrometer. We injected 1  $\mu$ L of each mono-/sesqui-  
507 terpene sample directly, with a split flow ratio of 30:1. We used an oven profile of 40°C,  
508 followed by a ramp of 3°C min<sup>-1</sup> to 115°C (monoterpenes) or 130°C (sesquiterpenes) and then  
509 30°C min<sup>-1</sup> to 250°C with a 2 min hold. Peaks were integrated and analysed using the  
510 Chromeleon Chromatography Data System Software.

511 Signal peaks from the GC were integrated and standardized based on the toluene internal  
512 standard (peak area/internal standard peak area) for each vial. Additionally, we used standard  
513 curves of the four pure PSC to measure changes in concentration in the samples when compared  
514 to controls. Standard curves were made to incorporate the possible ranges of concentrations (0  
515  $\mu$ L/mL to 3.5  $\mu$ L/mL) within the experiment. Proportional change of bacterial treatments versus  
516 the nonbacterial control was then calculated. Specifically, we took the average of the non-  
517 bacterial control standardized peak areas and subtracted the control average from all the bacteria-  
518 compound peak areas. Then, we divided the adjusted value by the non-bacterial control average  
519 to obtain the percent change [(bacterial standardized peak area – average of control standardized  
520 peak areas)/average of control standardized peak area]. We then analysed the standardized values

521 in JMP Pro 13 by performing one-sampled Student's *t*-tests for each compound with a null  
522 hypothesis of  $\mu=0$ , representing no change between compound abundance in bacteria-treated and  
523 the non-bacterial control. Since we were performing 15 separate statistical tests for each  
524 compound (between non-bacterial control and each of the 15 bacterial isolates), we used a  
525 Bonferroni correction to avoid false positives ( $\alpha=.05/15=.0033$ ).

526 **Bacterial community changes when fungus gardens are exposed to PSC.** Two different doses  
527 of compound were used in this experiment: 5  $\mu\text{L}$  in 5.08 cm flame-sealed 50  $\mu\text{L}$  capillaries and  
528 25  $\mu\text{L}$  in 5.08 cm flame-sealed 100  $\mu\text{L}$  capillaries. For each dose there were three treatment  
529 groups: (A) control (no compound) (B)  $\alpha$ -pinene and (C) linalool. For each treatment,  
530 approximately 5 g of the top-middle layer of fungus garden were taken from the same five *Atta*  
531 *cephalotes* colonies used in the headspace experiment (5 colonies x 3 treatments x 2 doses = 30  
532 sub-colonies). The fungus garden piece was placed in a 60 mm glass petri dish to ensure stability  
533 and to make final collection easier. Then, the fungus garden piece was placed into a 12 oz glass  
534 jar with metal lids (Nakpunar, New Jersey, USA). When all fungus garden pieces had been  
535 randomly assigned a treatment for each dose, glass capillaries containing either (A) nothing (B)  
536  $\alpha$ -pinene and (C) linalool were placed in a glass tube to hold the capillary upright, then put in the  
537 appropriate jar containing fungus garden.

538 *DNA extraction + 16S rRNA sequencing* After 48 hours, fungus garden pieces were collected  
539 into 50 mL conical tubes and weighed. Total DNA was extracted using a bacterial enrichment  
540 method previously described <sup>32</sup>. Briefly, the fungus garden material was homogenized using a  
541 sterile mortar and pestle. Then, the homogenized material was submerged in 1X PBS containing  
542 0.1% Tween 80, followed by centrifugation for 15 min at 500-700rpm. This results in a layered  
543 mixture containing leaf-material and fungal mass at the bottom, and bacteria in the middle/top.



544 This washing step was repeated until the bacterial layer became more transparent (about 3-5  
545 times). Then the bacterial sample was spun down, the pellet was resuspended in 1X PBS + .1%  
546 Tween 80 and passed through a 40  $\mu$ m filter to remove any larger, non-bacterial debris. The filter  
547 was flushed with an additional 5 mL 1XPBS + .1% Tween 80 then the entire sample was spun  
548 down again. Total DNA was extracted using a Qiagen DNeasy Plant Mini Kit. DNA was  
549 submitted to the Biotechnology Center for library preparation and sequencing. Specifically,  
550 amplicon libraries spanning the V4 region of the 16S ribosomal gene were constructed and then  
551 sequenced using Illumina MiSeq 2x300bp at the University of Wisconsin – Madison  
552 Biotechnology Center.

553 Sequence reads were processed, aligned, and categorized using DADA2 1.12.1<sup>70</sup>. The DADA2  
554 pipeline (<https://benjjneb.github.io/dada2/tutorial.html>) was followed almost exactly in July  
555 2019. The only change was made in the filtering step using altered truncLen and trimLeft  
556 parameters since we sequenced 2x300bp reads (truncLen=c(225,280); trimLeft=c(10,10)). The  
557 statistical analysis was performed as described in the DADA2 pipeline provided above.

558 Additional microbiome analyses, including the violin plots in Figure 5C, were adapted from  
559 <https://bioconductor.org/help/course->

560 [materials/2017/BioC2017/Day1/Workshops/Microbiome/MicrobiomeWorkflowII.html](https://bioconductor.org/help/course-materials/2017/BioC2017/Day1/Workshops/Microbiome/MicrobiomeWorkflowII.html). The  
561 adapted code can be found in [github.com/cfrancoeur/PSC](https://github.com/cfrancoeur/PSC).

562 **Headspace sampling of fungus gardens with PSC.** *Atta cephalotes* colonies (Table S5) were  
563 used in this experiment to create sub-colonies. 20 mL 18 mm Restek (Bellefonte, PA, USA) vials  
564 (cat#23082) with magnetic screw-thread caps (cat#23090) were prepared three ways with  $\alpha$ -  
565 pinene or linalool: (1) Empty vials with a 20  $\mu$ L Accu-Fill 90 micropet cut to 2.54 cm and flame-  
566 sealed containing 1  $\mu$ L of PSC (n=6). (2) Vials with approximately 0.3-0.4g of cotton with a 2.54

567 cm flame-sealed micropet containing 1  $\mu$ L of PSC (n=3). (3) Vials with approximately 0.3g of  
568 fungus garden material with all ants manually removed. Vials contained a 2.54 cm flame-sealed  
569 micropet containing 1  $\mu$ L of PSC (n=3 subsamples x 3-5 different *Atta cephalotes* colonies).  
570 Three colonies were used in the  $\alpha$ -pinene experiment and five colonies were used in the linalool  
571 experiment. Three colonies with three subsamples was determined to have enough statistical  
572 power for the observed differences. We also prepared samples of vials with only fungus garden  
573 (i.e. no exposure to PSC) during certain runs to ensure that there were no detectable PSC innate  
574 to the system. This was done for three separate time points based on exposure to a PSC: 12 hours  
575 post-exposure, 24 hours post-exposure, and 36 hours post-exposure. At these given time points,  
576 each respective set of vials were destructively sampled and analysed by a Shimadzu HS20  
577 Headspace Sampler coupled to a Shimadzu GC-2010 Plus with a flame ionization detector.  
578 Specifically, vials were loaded into the headspace sampler and injected into a column with a 50:1  
579 split flow ratio. For the vials with  $\alpha$ -pinene, the headspace sampler and oven were at 60°C,  
580 followed by a 20°C/min ramp up to 140°C. For the vials with linalool, which has a higher boiling  
581 point than  $\alpha$ -pinene, the headspace sampler and oven were kept at 70°C, followed by a 25°C/min  
582 ramp up to 205°C. Then, compounds were identified using retention time ( $\alpha$ -pinene=3.2  
583 minutes, linalool=6.2 minutes) and areas under the curve were calculated in Shimadzu's  
584 LabSolutions software to determine the relative difference in  $\alpha$ -pinene or linalool between vials.  
585  $\alpha$ -pinene and linalool are compounds that the garden bacteria can degrade and are inhibitory  
586 against *Leucoagaricus* sp.

587 Since we took subsamples (sub-colonies) from each *Atta cephalotes* colony (3 subsamples x 3  
588 time points x 5 colonies), we employed a linear mixed-effects model to account for the  
589 correlation (non-independence) between subsamples. Specifically, to test if ant colony had an

590 effect on the observed value, we used the lmer package v. 3.1-0, holding time and treatment as  
591 the fixed effects and ant colony as the random effect. Before the analysis, we divided the values  
592 by 1,000,000 to rescale the response for the lmer optimization procedure. For the  $\alpha$ -pinene  
593 treatment, the colony variance is reported as 0, indicating that the variability with respect to ant  
594 colony is much smaller than the variability with respect to the residual error. For the linalool  
595 treatment, the colony variance was 0.000226, indicating that some of the variability observed  
596 was due to the sampling from different colonies. We then used the estimated marginal means  
597 (EMMs) with the emmeans package v. 1.3.5 for linear regression analysis of the data, using the  
598 pairs() method. Marginal means were compared pairwise between exhaustive two-way level  
599 combinations of treatment (control, cotton, fungus garden) and of time (12hr, 24hr, 36hr).  
600 Assumptions of normality, linearity, and homoscedasticity for linear regression were examined  
601 by plot diagnostics and were met for each analysis. All the code used in this analysis is available  
602 at [github.com/cfrancoeur/PSC](https://github.com/cfrancoeur/PSC).

603 **Headspace sampling of *Leucoagaricus* sp.** *Leucoagaricus* sp. strains were isolated by plating  
604 small pieces of healthy fungus garden on Potato-Dextrose Agar (PDA). Laboratory fungus-  
605 farming ant colonies are kept in a temperature-controlled 28°C room in separate large plastic  
606 containers. Five *Atta cephalotes* colonies collected over the course of several years (2012-2018)  
607 from Costa Rica were used for this experiment. Additionally, several isolates from Brazilian *Atta*  
608 gardens used in the *Leucoagaricus* tolerance experiment (Figure 2) were also included.

609 2 mL of PDA was pipetted into 20 mL 18 mm Restek vials with magnetic screw-thread caps and  
610 left to solidify on a slant. Then, 3x3 mm pieces of freshly growing *Leucoagaricus* sp. strains  
611 were placed onto the slant and grown for one month at room temperature in the dark. Three vials  
612 were prepared for each of the *Atta cephalotes* cultivars (n=5 strains x 3 vials x 2 compounds) and

613 one vial was prepared for three additional *Leucoagaricus* sp. strains: AB1, AL2, AS1 (n=3  
614 strains x 1 vial x 2 compounds). After the month of growth, 20  $\mu$ L Accu-Fill 90 micropet  
615 (Becton, Dickinson and Company, N.J.) cut to 2.54 cm and flame-sealed were filled with (A)  
616 nothing (B) 1  $\mu$ L  $\alpha$ -pinene or (C) 1  $\mu$ L linalool and then added to the vials. After 36 hours of  
617 exposure, the headspace of the vials was analyzed with the same methodology described for the  
618 sub-colony headspace sampling. Signal peaks were statistically compared using a Welch two  
619 sample *t*-test, comparing the peaks from the control vials to the vials containing *Leucoagaricus*  
620 sp.

## 621 References

- 622 1. Agrawal, A. A. Phenotypic plasticity in the interactions and evolution of species. *Science*  
623 (80- ). **294**, 321–326 (2001).
- 624 2. Ehrlich, P. R. & Raven, P. H. Butterflies and Plants : A Study in Coevolution. *Evolution*  
625 (N. Y). **18**, 586–608 (1964).
- 626 3. Berenbaum, M. R. & Zangerl, A. R. Chemical phenotype matching between a plant and its  
627 insect herbivore. *Proc. Natl. Acad. Sci. U. S. A.* **95**, 13743–13748 (1998).
- 628 4. Cornell, H. V. & Hawkins, B. A. Herbivore Responses to PSC: A Test of Phytochemical  
629 Coevolution Theory. *Am. Nat.* **161**, 507–522 (2003).
- 630 5. Marquis, R. J. Herbivores Rule. *Science (80- )*. **305**, 619–621 (2004).
- 631 6. Fine, P. V. A., Mesones, I. & Coley, P. D. Herbivores promote habitat specialization by  
632 trees in Amazonian forests. *Science (80- )*. **305**, 663–665 (2004).
- 633 7. Interface, I., Farrell, B. D., Mitter, C. & Futuyma, D. J. Diversification at the Insights  
634 from phylogenetics. **42**, 34–42 (1964).
- 635 8. Kennedy, C. E. J. Attachment may be a basis for specialization in oak aphids. *Ecol.*  
636 *Entomol.* **11**, 291–300 (1986).
- 637 9. Gorb, E. V. & Gorb, S. N. Attachment ability of the beetle *Chrysolina fastuosa* on various  
638 plant surfaces. *Entomol. Exp. Appl.* **105**, 13–28 (2002).
- 639 10. Bernays, E. A. Diet-Induced Head Allometry among Foliage-Chewing Insects and its  
640 Importance for Graminivores. *Science (80- )*. **231**, 495–497 (1986).
- 641 11. Walling, L. L. The myriad plant responses to herbivores. *J. Plant Growth Regul.* **19**, 195–  
642 216 (2000).
- 643 12. Maffei, M. E. Sites of synthesis, biochemistry and functional role of plant volatiles. *South*  
644 *African J. Bot.* **76**, 612–631 (2010).
- 645 13. Gleadow, R. M. & Woodrow, I. E. Constraints on effectiveness of cyanogenic glycosides  
646 in herbivore defense. *J. Chem. Ecol.* **28**, 1301–1313 (2002).
- 647 14. Kessler, A. & Baldwin, I. T. Defensive Function of Herbivore-Induced Plant Volatile  
648 Emissions in Nature. *Plant Cell Physiol. Proc. Natl. Acad. Sci. U.S.A. Sci. J. Zurzycki K.*  
649 *Nozue al. Proc. Natl. Acad. Sci. U.S.A. Plant Cell* **41**, 415–50 (2000).
- 650 15. Adams, A. S., Boone, C. K., Bohlmann, J. & Raffa, K. F. Responses of Bark Beetle-  
651 Associated Bacteria to Host Monoterpenes and Their Relationship to Insect Life Histories.  
652 *J. Chem. Ecol.* **37**, 808–817 (2011).
- 653 16. Boone, C. K. *et al.* Bacteria Associated with a Tree-Killing Insect Reduce Concentrations  
654 of Plant Defense Compounds. *J. Chem. Ecol.* **39**, 1003–1006 (2013).
- 655 17. Howe, M., Keefover-Ring, K. & Raffa, K. F. Pine Engravers Carry Bacterial  
656 Communities Whose Members Reduce Concentrations of Host Monoterpenes With  
657 Variable Degrees of Redundancy, Specificity, and Capability. *Environ. Entomol.* **47**, 638–  
658 645 (2018).
- 659 18. Berasategui, A. *et al.* Gut microbiota of the pine weevil degrades conifer diterpenes and  
660 increases insect fitness. *Mol. Ecol.* **26**, 4099–4110 (2017).
- 661 19. Mason, C. J., Couture, J. J. & Raffa, K. F. Plant-associated bacteria degrade defense  
662 chemicals and reduce their adverse effects on an insect defoliator. *Oecologia* **175**, 901–  
663 910 (2014).
- 664 20. Lauzon, C. R., Potter, S. E. & Prokopy, R. J. Degradation and Detoxification of the  
665 Dihydrochalcone Phloridzin by *Enterobacter agglomerans*, a Bacterium Associated with  
666 the Apple Pest, *Rhagoletis pomonella*(Walsh) (Diptera: Tephritidae). *Environ. Entomol.*

- 667           **32**, 953–962 (2003).
- 668   21.   Brune, A., Miambi, E. & Breznak, J. A. Roles of oxygen and the intestinal microflora in  
669       the metabolism of lignin- derived phenylpropanoids and other monoaromatic compounds  
670       by termites. *Appl. Environ. Microbiol.* **61**, 2688–2695 (1995).
- 671   22.   Ceja-Navarro, J. A. *et al.* Gut microbiota mediate caffeine detoxification in the primary  
672       insect pest of coffee. *Nat. Commun.* **6**, 1–9 (2015).
- 673   23.   Douglas, A. E. Microbial Brokers of Insect-Plant Interactions Revisited. *J. Chem. Ecol.*  
674       **39**, 952–961 (2013).
- 675   24.   Rockwood, L. L. Plant Selection and Foraging Patterns in Two Species of Leaf-Cutting  
676       Ants (*Atta*). *Ecology* **57**, 48–61 (1976).
- 677   25.   Wirth, R., Herz, H., Ryel, R. J., Beyschlag, W. & Holldobler, B. *Herbivory of leaf-cutting*  
678       *ants : a case study on Atta colombica in the tropical rainforest of Panama.* (Berlin ; New  
679       York : Springer, [2003] ©2003, 2003).
- 680   26.   Holldobler, B. & Wilson, E. O. *The Ants.* (Harvard University Press, 1990).
- 681   27.   Holldobler, B. & Wilson, E. O. *The Superorganism: The Beauty, Elegance, and*  
682       *Strangeness of Insect Societies.* (W.W. Norton & Company, 2008).
- 683   28.   Zhukova, M., Sapountzis, P., Schiøtt, M. & Boomsma, J. J. Diversity and transmission of  
684       gut bacteria in *Atta* and *Acromyrmex* leaf-cutting ants during development. *Front.*  
685       *Microbiol.* **8**, (2017).
- 686   29.   Sapountzis, P. *et al.* *Acromyrmex* leaf-cutting ants have simple gut microbiota with  
687       nitrogen-fixing potential. *Appl. Environ. Microbiol.* **81**, 5527–5537 (2015).
- 688   30.   Moreira-Soto, R. D., Sanchez, E., Currie, C. R. & Pinto-Tomás, A. A. Ultrastructural and  
689       microbial analyses of cellulose degradation in leaf-cutter ant colonies. *Microbiol. (United*  
690       *Kingdom)* **163**, 1578–1589 (2017).
- 691   31.   Aylward, F. O. *et al.* Metagenomic and metaproteomic insights into bacterial communities  
692       in leaf-cutter ant fungus gardens. *ISME J.* **6**, 1688–1701 (2012).
- 693   32.   Suen, G. *et al.* An insect herbivore microbiome with high plant Biomass-degrading  
694       capacity. *PLoS Genet.* **6**, (2010).
- 695   33.   Aylward, F. O. *et al.* Convergent bacterial microbiotas in the fungal agricultural systems  
696       of insects. *MBio* **5**, 1–10 (2014).
- 697   34.   Kopac, S. *et al.* High-Quality Draft Genome Sequences of Eight Bacteria Isolated from  
698       Fungus Gardens Grown by *Trachymyrmex septentrionalis* Ants. *Microbiol. Resour.*  
699       *Announc.* 1–3 (2018).
- 700   35.   González, C. T., Saltonstall, K. & Fernández-Marín, H. Garden microbiomes of  
701       *Apterostigma dentigerum* and *Apterostigma pilosum* fungus-growing ants (Hymenoptera:  
702       Formicidae). *J. Microbiol.* (2019). doi:10.1007/s12275-019-8639-0
- 703   36.   Khadempour, L. *et al.* Metagenomics reveals diet-specific specialization of bacterial  
704       communities in fungus gardens of grass- and dicot-cutter ants. *bioRxiv* 250993 (2019).  
705       doi:10.1101/250993
- 706   37.   Pinto-Tomás, A. A. *et al.* Symbiotic Nitrogen Fixation in the Fungus Gardens of Leaf  
707       Cutter Ants. *Science (80-. )*. **326**, 1120–1123 (2009).
- 708   38.   Dowd, P. F. Insect fungal symbionts: A promising source of detoxifying enzymes. *J. Ind.*  
709       *Microbiol.* **9**, 149–161 (1992).
- 710   39.   De Fine Licht, H. H. *et al.* Laccase detoxification mediates the nutritional alliance  
711       between leaf-cutting ants and fungus-garden symbionts. *Proc. Natl. Acad. Sci. U. S. A.*  
712       **110**, 583–7 (2013).



- 713 40. Schoonhoven, L., van Loon, J. J. & Dicke, M. Insect-plant biology. in 49–86 (Oxford,  
714 2005).
- 715 41. De Fine Licht, H. H. & Boomsma, J. J. Forage collection, substrate preparation, and diet  
716 composition in fungus-growing ants. *Ecol. Entomol.* **35**, 259–269 (2010).
- 717 42. Schultz, T. R. & Brady, S. G. Major evolutionary transitions in ant agriculture. *Proc. Natl.*  
718 *Acad. Sci.* **105**, 5435–5440 (2008).
- 719 43. Hubbell, S. P., Howard, J. J. & Wiemer, D. F. Chemical Leaf Repellency to an Attine  
720 Ant : Seasonal Distribution Among Potential Host Plant Species. *Ecology* **65**, 1067–1076  
721 (1984).
- 722 44. Maria, F. *et al.* Activity of Ricinus communis ( Euphorbiaceae ) and ricinine against the  
723 leaf-cutting ant Atta sexdens rubropilosa ( Hymenoptera : Formicidae ) and the symbiotic  
724 fungus Leucoagaricus gongylophorus. **938**, 933–938 (2004).
- 725 45. Lapointe, S. L., Serrano, M. S. & Corrales, I. I. Resistance to leafcutter ants  
726 (Hymenoptera: Formicidae) and inhibition of their fungal symbiont by tropical forage  
727 grasses. *J. Econ. Entomol.* **89**, 757–765 (1996).
- 728 46. Howard, J. J., Cazin, J. J. & Wiemer, D. F. Toxicity of terpenoid deterrent to the  
729 leafcutting ant Atta cephalotes and its mutualistic fungus. *J. Chem. Ecol.* **14**, 59–69  
730 (1988).
- 731 47. Martin, V. J. J., Yu, Z. & Mohn, W. W. Recent advances in understanding resin acid  
732 biodegradation: Microbial diversity and metabolism. *Arch. Microbiol.* **172**, 131–138  
733 (1999).
- 734 48. Janocha, S., Schmitz, D. & Bernhardt, R. Terpene Hydroxylation with Microbial  
735 Cytochrome P450 Monooxygenases. in *Biotechnology of Isoprenoids* **148**, 215–250  
736 (2015).
- 737 49. van der Vlugt-Bergmans, C. J. B. & van Der Werf, M. J. Genetic and Biochemical  
738 Characterization of a Novel Monoterpene  $\epsilon$ -Lactone Hydrolase from. *Appl. Environ.*  
739 *Microbiol.* **67**, 733–741 (2001).
- 740 50. Whitehouse, C. J. C., Bell, S. G. & Wong, L.-L. P450<sub>BM3</sub> (CYP102A1): connecting the  
741 dots. *Chem. Soc. Rev.* **41**, 1218–1260 (2012).
- 742 51. Schmitz, D., Janocha, S., Kiss, F. M. & Bernhardt, R. CYP106A2—A versatile biocatalyst  
743 with high potential for biotechnological production of selectively hydroxylated steroid and  
744 terpenoid compounds. *Biochim. Biophys. Acta - Proteins Proteomics* **1866**, 11–22 (2018).
- 745 52. Peterson, J. A. *et al.* Cytochrome P-450(terp). Isolation and purification of the protein and  
746 cloning and sequencing of its operon. *J. Biol. Chem.* **267**, 14193–14203 (1992).
- 747 53. Ullah, A. J. H., Murray, R. I., Bhattacharyya, P. K., Wagner, G. C. & Gunsalus, I. C.  
748 Protein Components of a Cytochrome P-450 Linalool 8-Methyl Hydroxylase. *J. Biol.*  
749 *Chem.* **265**, 1345–1351 (1990).
- 750 54. Matsuoka, T. *et al.* Purification and characterization of cytochrome P-450<sub>sca</sub> from  
751 Streptomyces carbophilus. *Eur. J. Biochem.* **184**, 707–713 (1989).
- 752 55. Unger, B. P., Gunsalus, I. C. & Sligar, S. G. Nucleotide sequence of the Pseudomonas  
753 putida cytochrome P-450(cam) gene and its expression in Escherichia coli. *J. Biol. Chem.*  
754 **261**, 1158–1163 (1986).
- 755 56. Sawada, N. *et al.* Conversion of vitamin D3 to 1 $\alpha$ ,25-dihydroxyvitamin D 3 by  
756 Streptomyces griseolus cytochrome P450SU-1. *Biochem. Biophys. Res. Commun.* **320**,  
757 156–164 (2004).
- 758 57. Janocha, S. *et al.* Resin Acid Conversion with CYP105A1: An Enzyme with Potential for

- 759 the Production of Pharmaceutically Relevant Diterpenoids. *ChemBioChem* **14**, 467–473  
760 (2013).
- 761 58. Siedenburg, G. & Jendrossek, D. Squalene-hopene cyclases. *Appl. Environ. Microbiol.* **77**,  
762 3905–3915 (2011).
- 763 59. Fuchs, G., Boll, M. & Heider, J. Microbial degradation of aromatic compounds- From one  
764 strategy to four. *Nat. Rev. Microbiol.* **9**, 803–816 (2011).
- 765 60. Marmulla, R. & Harder, J. Microbial monoterpene transformations-a review. *Front.*  
766 *Microbiol.* **5**, 1–14 (2014).
- 767 61. Adams, A. S. *et al.* Mountain pine beetles colonizing historical and naive host trees are  
768 associated with a bacterial community highly enriched in genes contributing to terpene  
769 metabolism. *Appl. Environ. Microbiol.* **79**, 3468–3475 (2013).
- 770 62. Kohl, K. D. & Dearing, M. D. Experience matters: Prior exposure to plant toxins enhances  
771 diversity of gut microbes in herbivores. *Ecol. Lett.* **15**, 1008–1015 (2012).
- 772 63. Lewin, G. R. *et al.* Cellulose-enriched microbial communities from leaf-cutter ant (*Atta*  
773 *colombica*) refuse dumps vary in taxonomic composition and degradation ability. *PLoS*  
774 *One* **11**, 1–22 (2016).
- 775 64. Altschup, S. F., Gish, W., Miller, W., Myers, E. W. & Lipman, D. J. Basic Local  
776 Alignment Search Tool. *J. Mol. Biol.* **215**, 403–410 (1990).
- 777 65. Buchfink, B., Xie, C. & Huson, D. H. Fast and sensitive protein alignment using  
778 DIAMOND. *Nat. Methods* **12**, 59–60 (2014).
- 779 66. Book, A. J. *et al.* Cellulolytic *Streptomyces* strains associated with herbivorous insects  
780 share a phylogenetically linked capacity to degrade lignocellulose. *Appl. Environ.*  
781 *Microbiol.* **80**, 4692–4701 (2014).
- 782 67. Wilke, A. *et al.* *MG-RAST Manual for version 4, revision 3.* (2017).
- 783 68. Bray, N. L., Pimentel, H., Melsted, P. & Pachter, L. Near-optimal probabilistic RNA-seq  
784 quantification. *Nat. Biotechnol.* **34**, 525–527 (2016).
- 785 69. Schindelin, J. *et al.* Fiji: An open-source platform for biological-image analysis. *Nat.*  
786 *Methods* **9**, 676–682 (2012).
- 787 70. Callahan, B. J. *et al.* DADA2: High-resolution sample inference from Illumina amplicon  
788 data. *Nat. Methods* **13**, 581–583 (2016).
- 789



790 **Data Availability.** All sequencing data has been uploaded to NCBI under the following  
791 BioProject numbers: PRJNA564151, PRNJNA429666, PRNJNA429667, PRNJNA429668,  
792 PRNJNA565936, PRJNA577467. Individual accession numbers for each dataset are included in  
793 Table S2, Table S3, and Table S5.

794 **Acknowledgments.** We are grateful to members of the Landick Lab and Amador-Noguez Lab at  
795 UW-Madison, Sherry Cao and Mehmet Tatli, for training on the Shimadzu Headspace sampler.  
796 We thank Michael Liou and Michael Howe for their assistance with the statistical analyses. We  
797 also thank the staff and scientists at the La Selva Biological Station for allowing field collections  
798 of *Atta cephalotes* and the scientists Allan Artavia and Miguel Pacheco in the Pinto-Tomás lab at  
799 University of Costa Rica for their assistance with field collections. We are also grateful to the  
800 Comisión Institucional de Biodiversidad of the University of Costa Rica (Resolución N° 009)  
801 and the Ministerio de Ambiente y Energía for providing collection permits in Costa Rica.  
802 Finally, we thank Heidi Horn for training on collecting fungus-farming ant colonies. This  
803 material is based upon work supported in part by the Great Lakes Bioenergy Research Center,  
804 U.S. Department of Energy, Office of Science, Office of Biological and Environmental Research  
805 under Award Numbers DE-SC0018409 and DE-FC02-07ER64494, the National Institutes of  
806 Health grant U19 TW009872, the National Science Foundation grant DEB-1927155, and  
807 Vicerrectoría de Investigación (810-B0-501), Universidad de Costa Rica, Ministerio de Ciencia,  
808 Tecnología y Telecomunicaciones (MICITT), Costa Rican Government and Florida Ice and  
809 Farm Company.

810 **Author contributions.** C.F., L.K., K.G., A.J.B, R.D.M-S., A.A.P-T., K.K-R., C.R.C designed  
811 research; C.F., A.J.B., R.D.M-S. performed research; C.F., K.G. analysed data, and C.F., L.K.,  
812 K.G., C.R.C. wrote the paper.

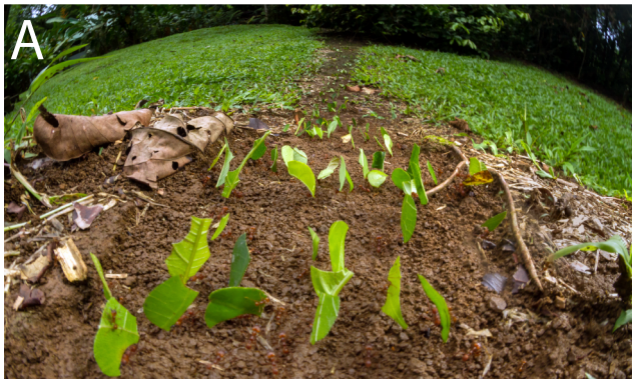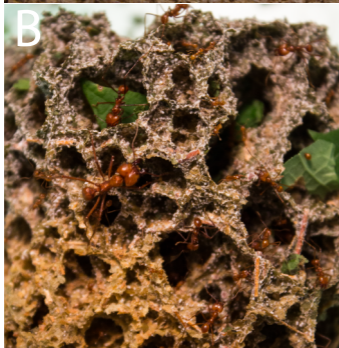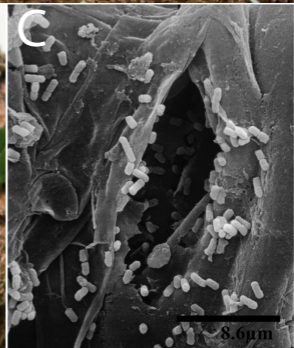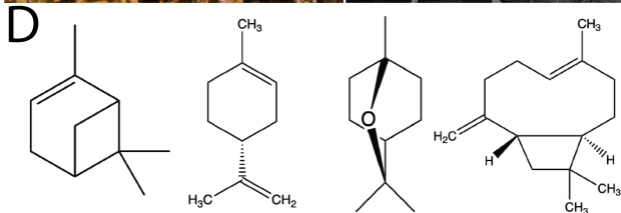

Figure 1. Leaf-cutter ants (*Atta cephalotes*) cut fresh leaf material at large scales, forming visible foraging trails (a) to bring the leaf material as a food source to their specialized fungus gardens (b). Bacteria are known to co-exist within the fungus garden, as can be seen from this SEM image (c). We can detect terpenes from the fresh leaf material in the fungus gardens using GC-MS. One *Atta laevigata* sample collected in an area with eucalyptus had detectable amounts of PSC, such as  $\alpha$ -pinene, *p*-cymene, eucalyptol, and caryophyllene oxide (36) (d). Photo credits: panel A Alexander Wild; panel B Lily Khadempour; panel C Rolando Moreira-Soto, reprinted from reference (30).

**A**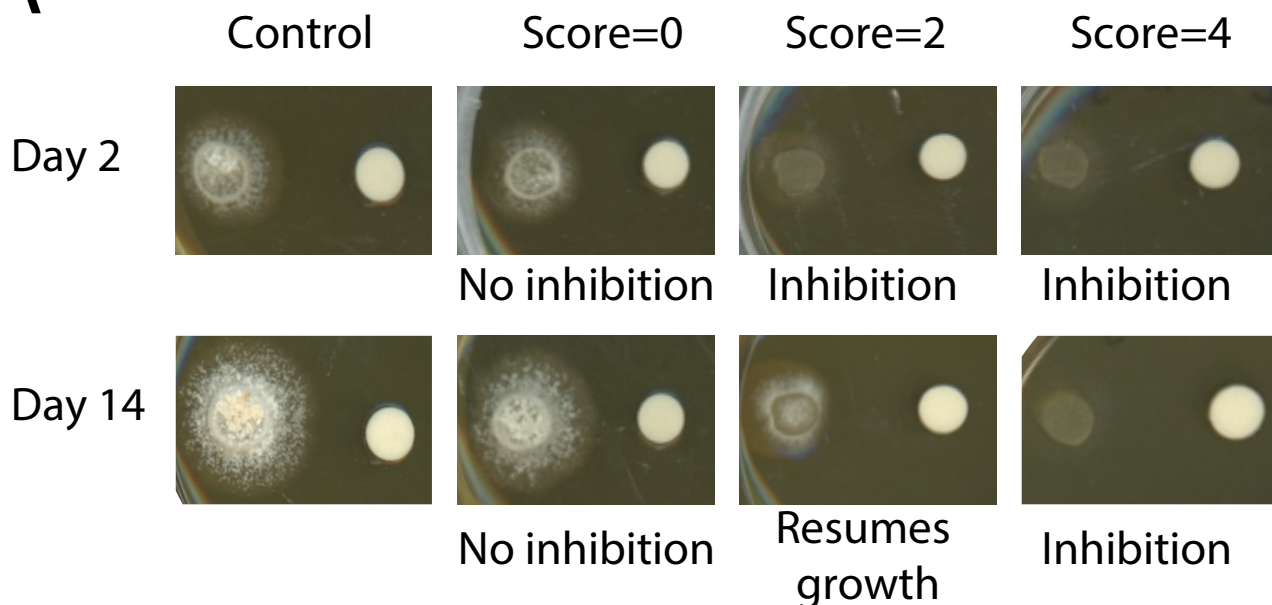**B**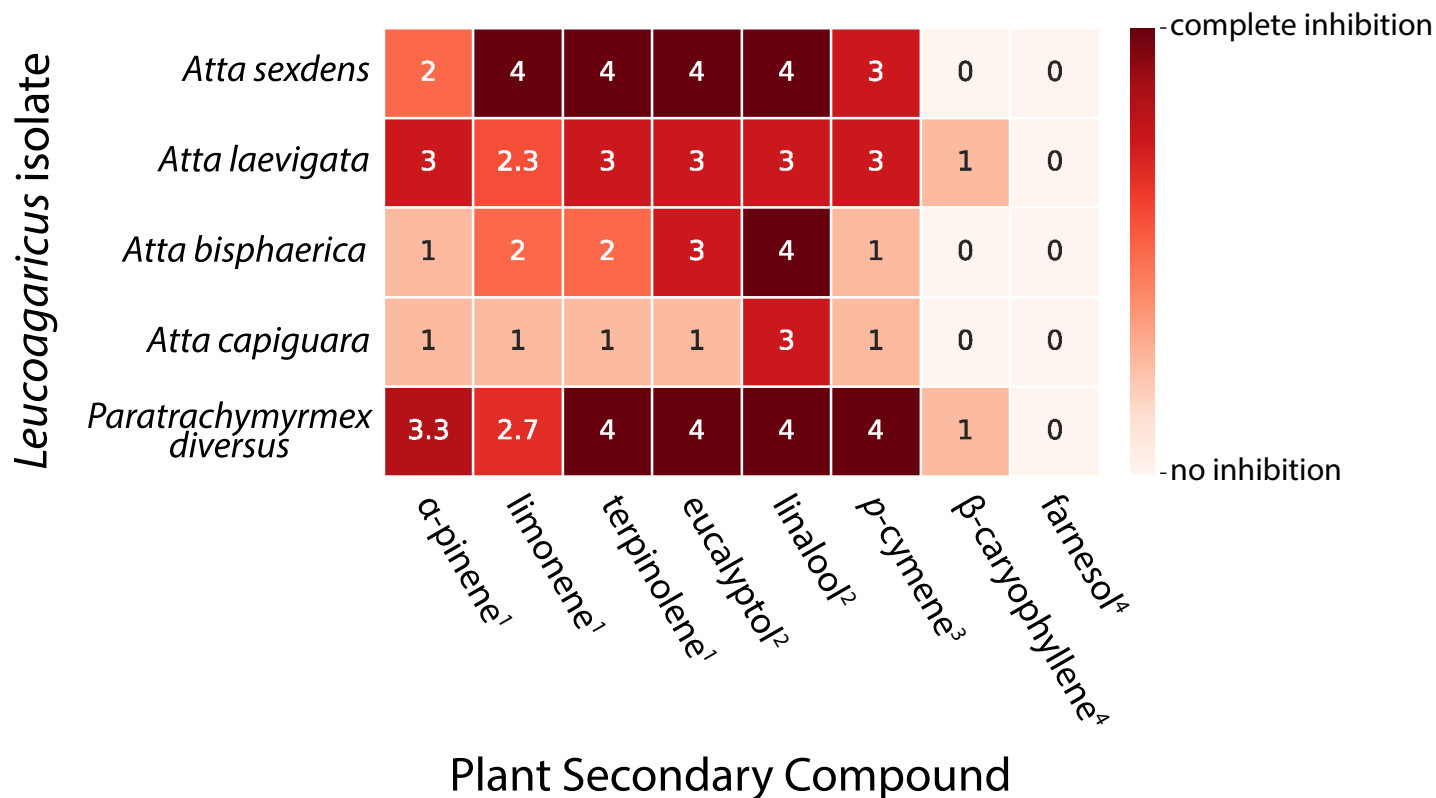

Figure 2. Tolerance of different *Leucoagaricus* sp. strains when exposed to eight PSC. The growth of *Leucoagaricus* sp. was qualitatively scaled (a). Each isolate was exposed to eight compounds using a disc assay, done in triplicate. The growth for each isolate was then scored and averaged across the 3 technical replicates (b). The terpene class is indicated by the superscript number. 1= monoterpene, 2=terpenoid, 3= alkylbenzene related to monoterpene, 4=sesquiterpene.

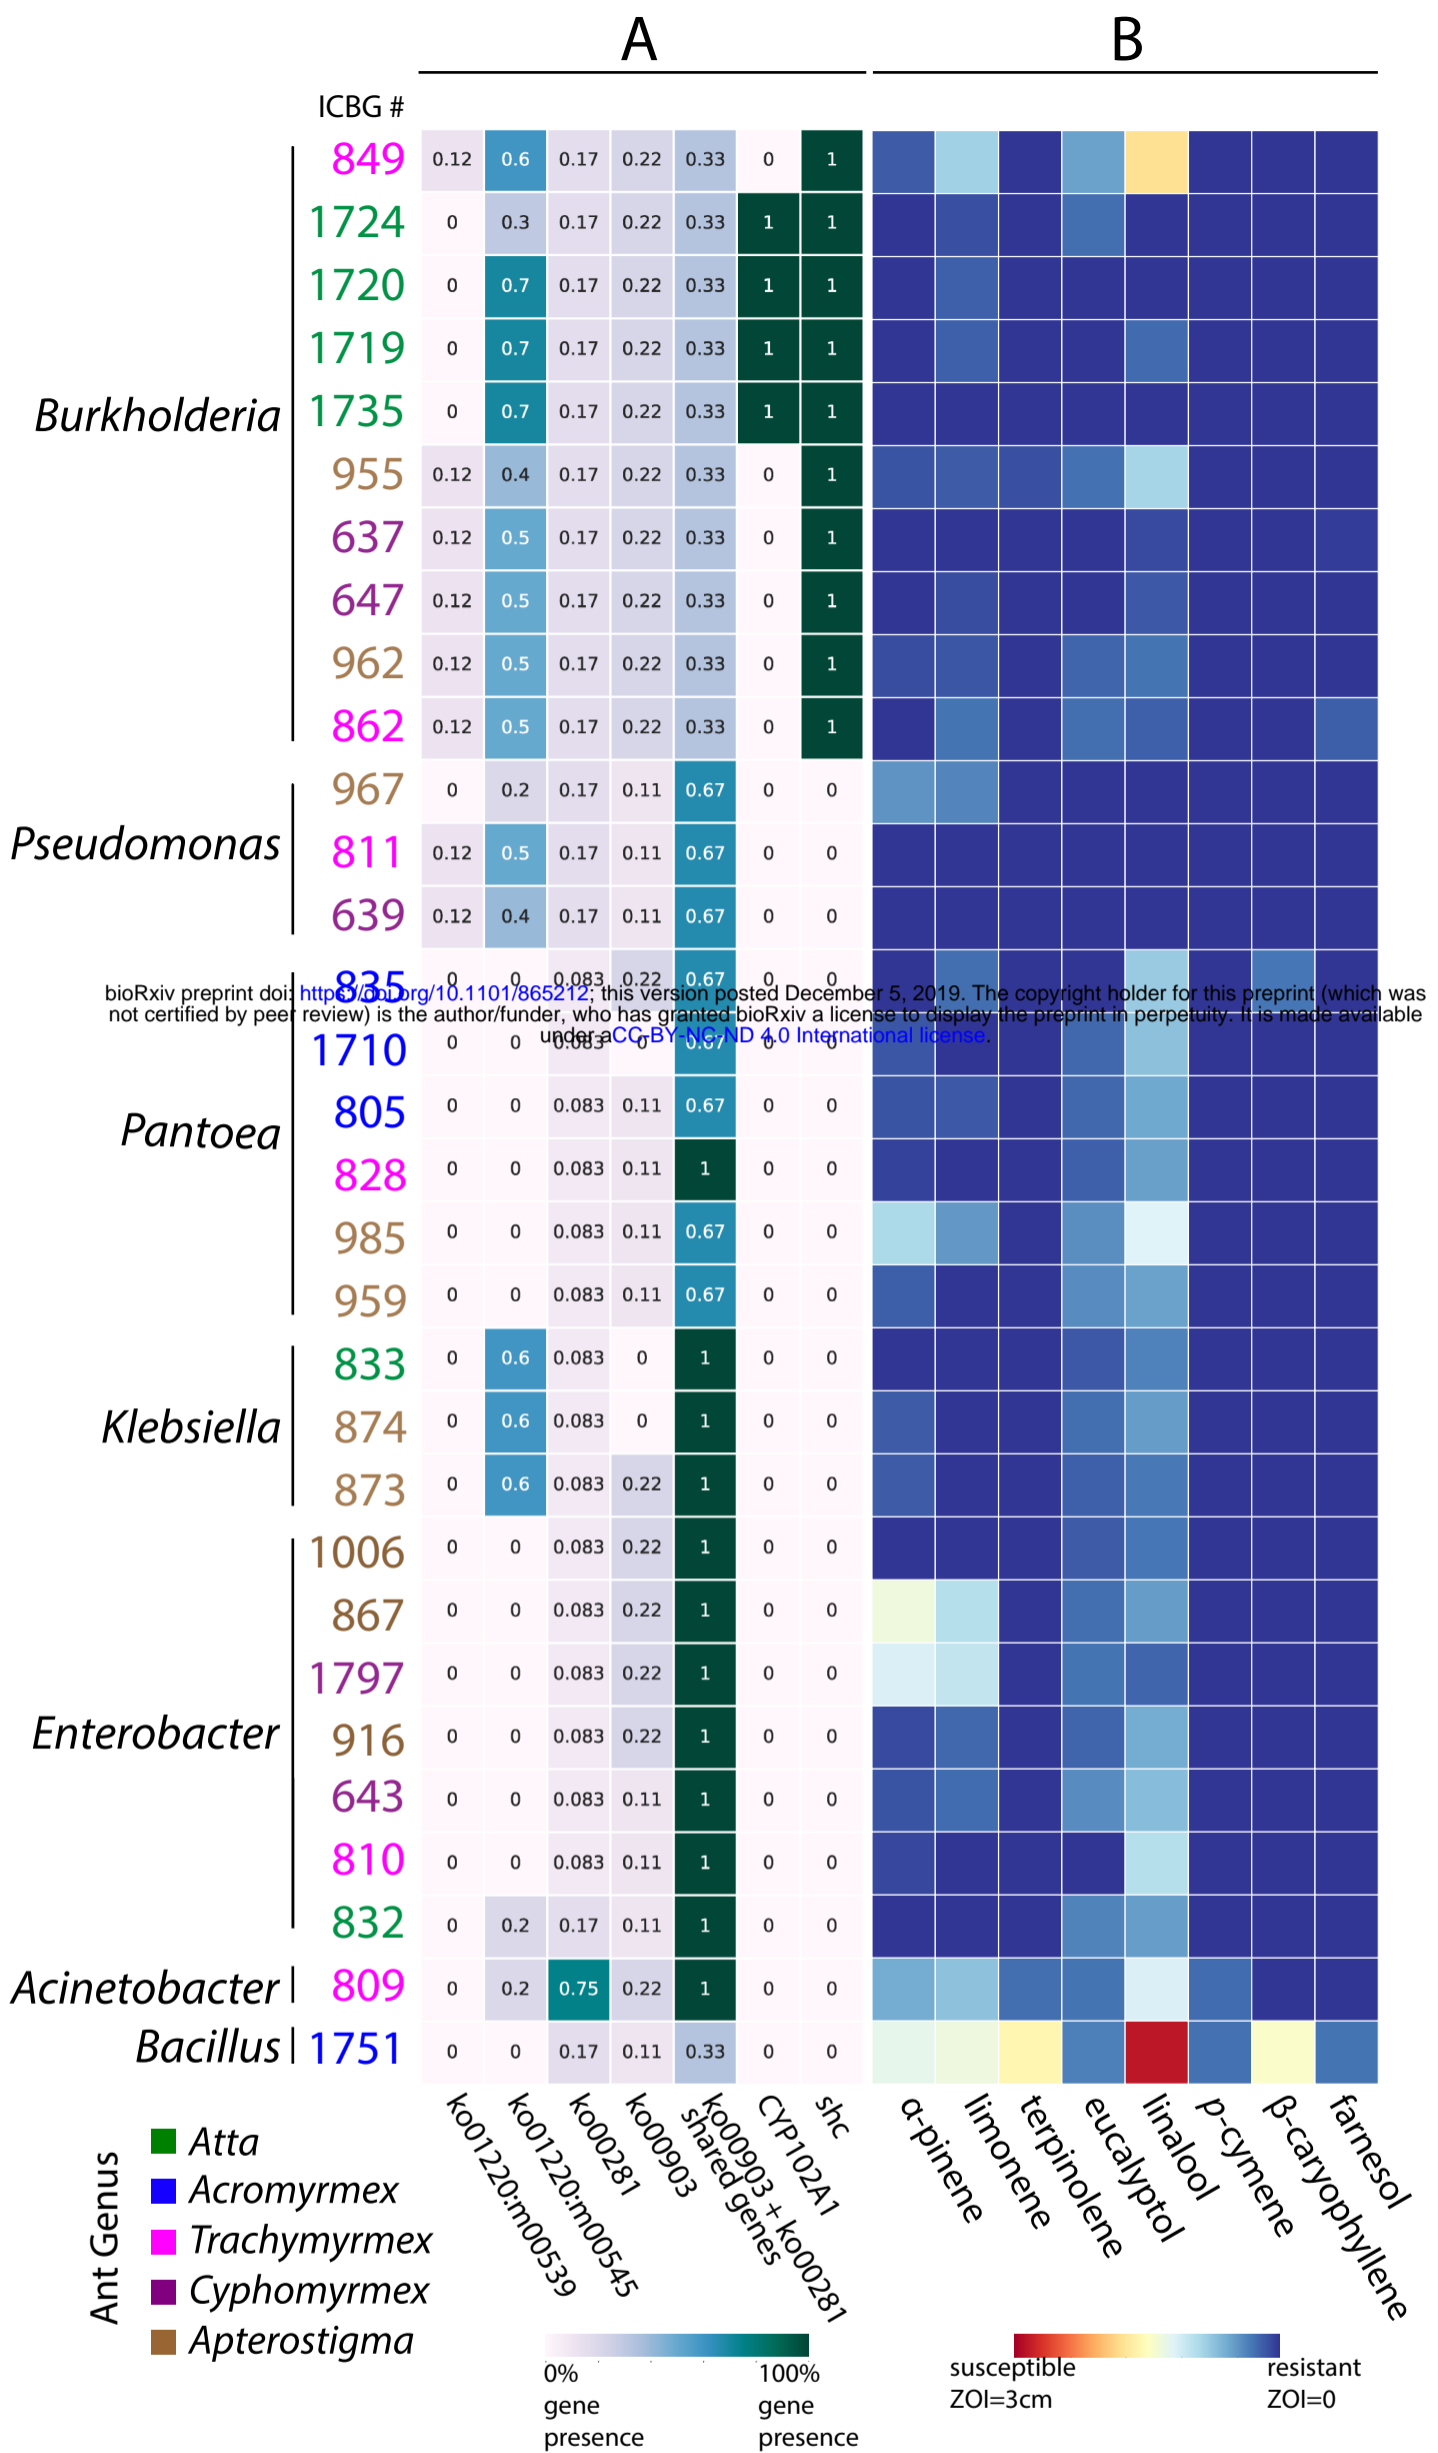

Figure 3. Bacteria isolated from different genera of fungus-farming ants (isolate numbers color-coded by colony of origin) are predicted to have genes involved in PSC transformation (a) and are able to survive in the presence of eight PSC (b). (a) ko01220:m00539 corresponds to the cumate degradation module in the degradation of aromatic compounds pathway. ko01220:m00545 corresponds to the trans-cinnamate degradation module in the degradation of aromatic compounds pathway. ko00281 corresponds to the geraniol degradation pathway. ko00903 corresponds to the  $\alpha$ -pinene/limonene degradation pathway. The shared genes between the geraniol pathway and the  $\alpha$ -pinene/limonene pathway are K01692, K01825, and K01782. All of the pathways are presented as proportions with 1 being 100% of the genes predicted to be present and 0 being 0% of the genes predicted to be present. CYP102A1 and shc are single genes and so 0 or 1 indicates the absence or presence of that sequence, respectively. 31/42 annotations are displayed here, the annotations for the remaining 11 genomes are included in supplementary, in addition to the metagenome and metatranscriptome annotations (Tables S3, S4, S7) (b) 46 isolates were tested but 31 isolates are displayed as these are isolates that have genomes and were tested for tolerance. Data from all 46 isolates are provided in Figure S1.

## Plant secondary compound reduction by bacterial isolates

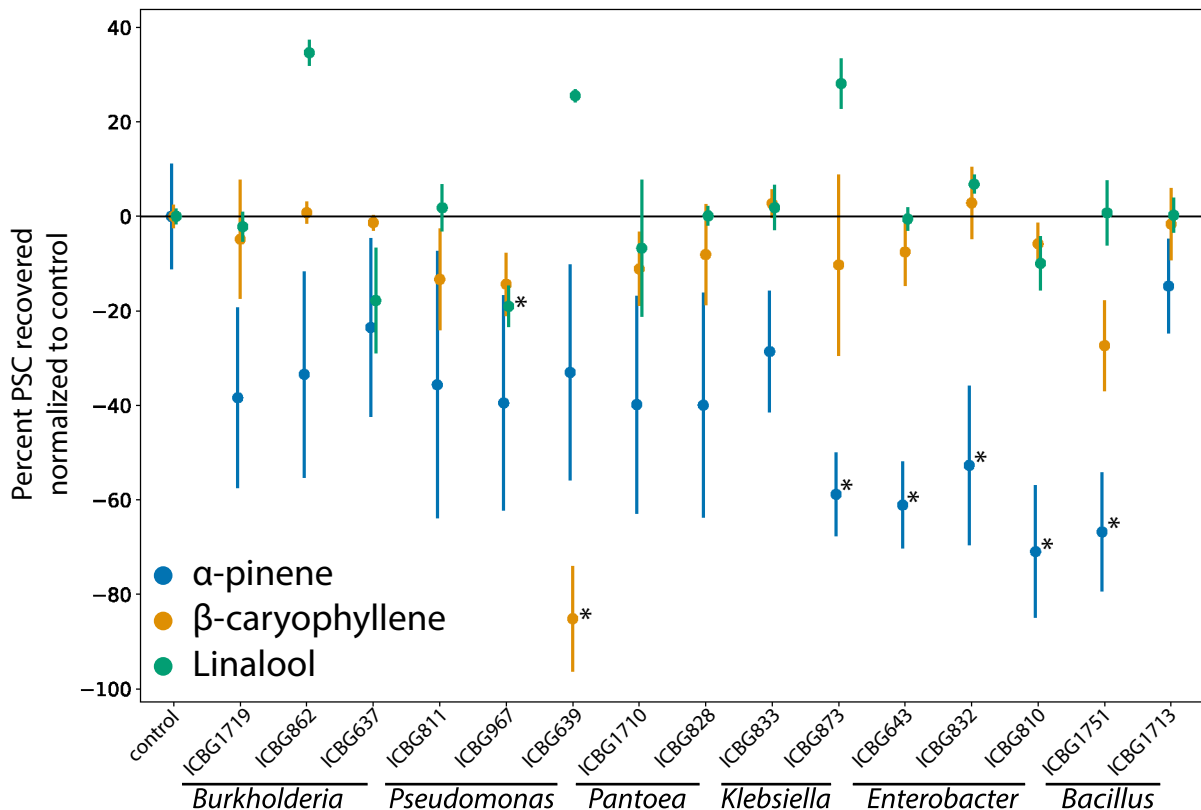

Figure 4. PSC reduction in vitro by 15 bacterial isolates. Bacterial isolates are grouped by their genus-level identification on the x-axis. The y-axis is the percent change of PSC recovered compared to a non-bacterial control vial (10% TSB + compound). Each point represents the average of three GC-MS measurements and the bars are the standard deviation of the observations.

A

Fungus garden reduction of  $\alpha$ -pinene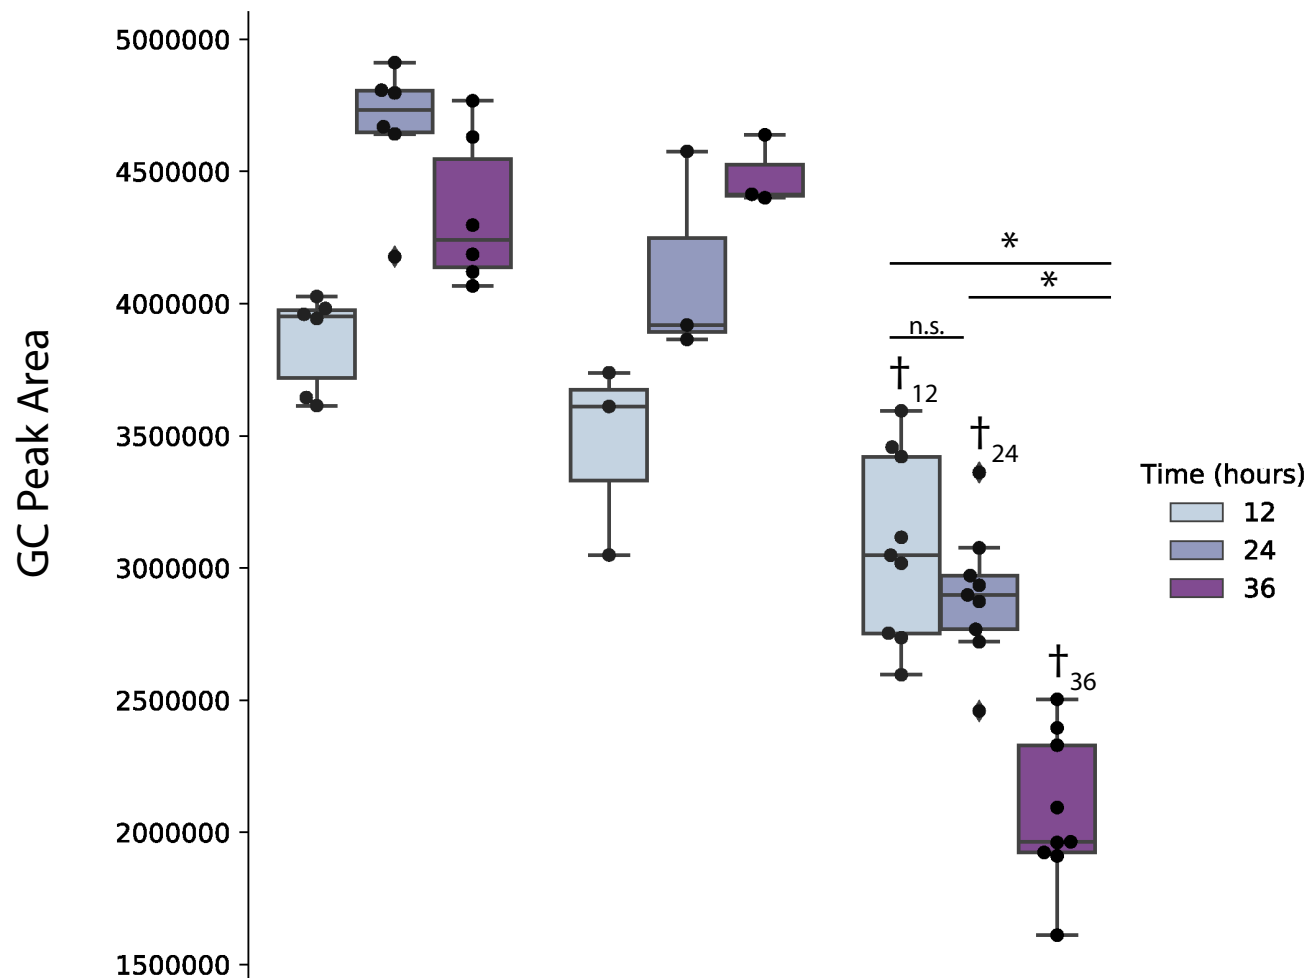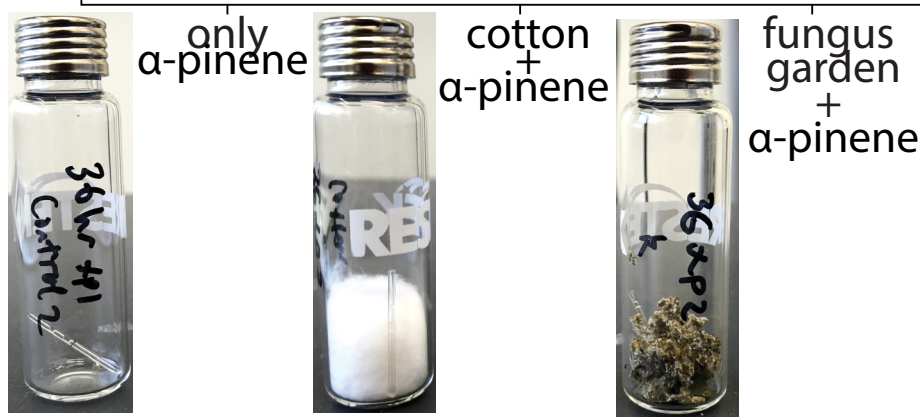

B

*Leucoagaricus* reduction of  $\alpha$ -pinene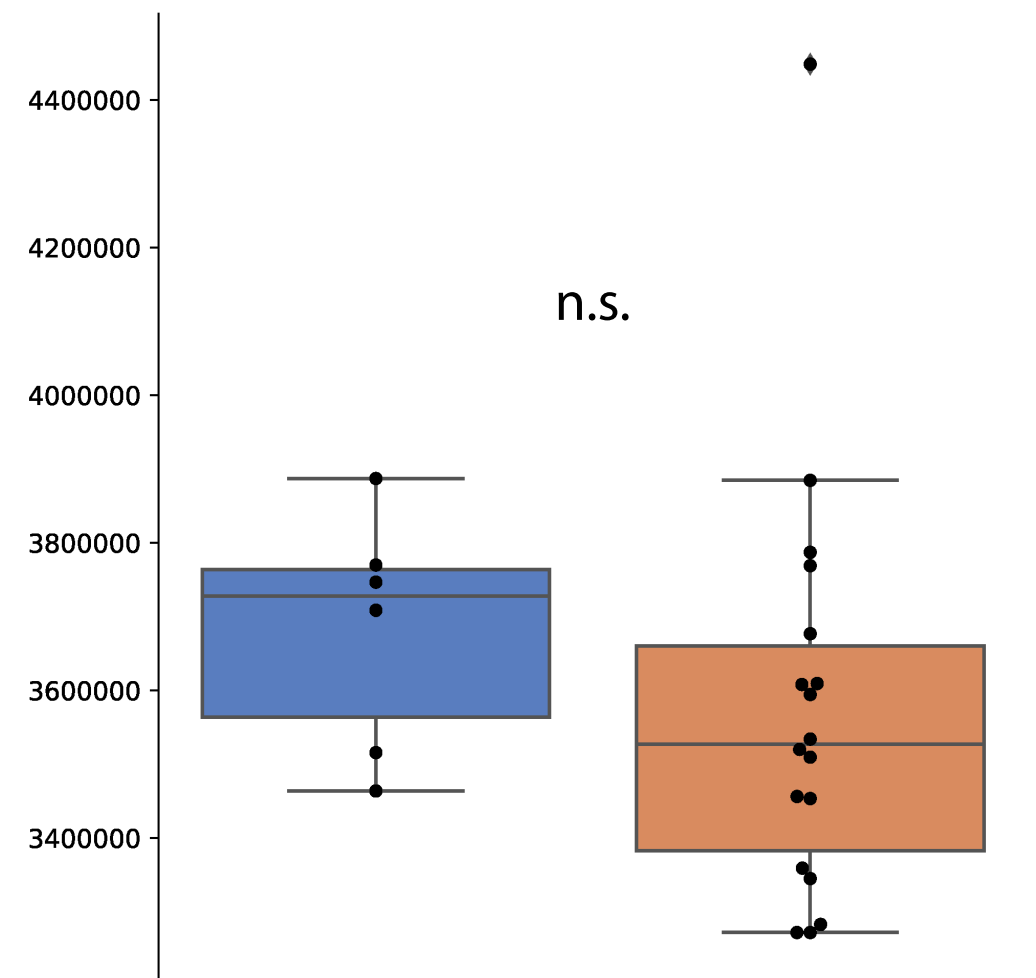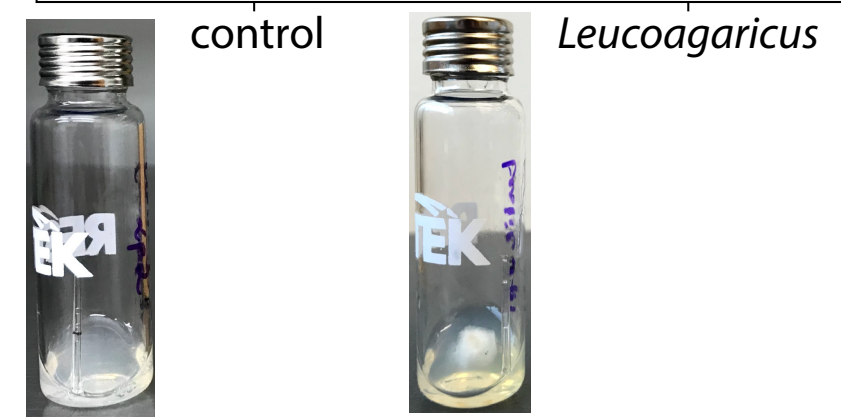

Figure 5. Three sub-colonies of three *Atta cephalotes* colonies were exposed to  $\alpha$ -pinene for 12, 24, 36 hours and reduction of  $\alpha$ -pinene was measured in the headspace (a). *Leucoagaricus* sp. from the lab colonies, as well as the *Atta* sp. strains tested in Figure 2, were grown on PDA and then exposed to  $\alpha$ -pinene for 36 hours. Headspace measurements were collected and compared to a vial with only PDA (b). In (a) and (b) each point represents a single measurement and is superimposed on top of a boxplot. The y-axis indicates the area under the curve with a retention time of  $\sim 3.2$  minutes, indicating the level of  $\alpha$ -pinene in the headspace of each vial. The asterisks (\*) indicate significance ( $p < 0.05$ ) between the fungus garden samples at different time points. The cross symbol (†) indicates significance ( $p < 0.05$ ) between the fungus garden sample and the control vials at the same time point. The pictures are examples of the experimental set up for each treatment.
